# Supplementary material for: Helicity induction and memory effect in poly(biphenylylacetylene)s bearing various functional groups and their use as switchable chiral stationary phases for HPLC
Source: Royal Society of Chemistry journal article supplement (doi:10.1039/c9py01425j), 2019-01-01
Supplement: c9py01425j1.pdf [file c9py01425j1.pdf]

(Supporting Information)

**Helicity Induction and Memory Effect in Poly(biphenylylacetylene)s Bearing Various Functional Groups and Their Use as Switchable Chiral Stationary Phases for HPLC**

Ryoma Ishidate,<sup>1,2</sup> Toru Sato,<sup>1</sup> Tomoyuki Ikai,<sup>1,2</sup> Shigeyoshi Kanoh,<sup>1</sup> Eiji Yashima\*<sup>2</sup> and Katsuhiro Maeda\*<sup>1,3</sup>

<sup>1</sup>*Graduate School of Natural Science and Technology, Kanazawa University, Kakuma-machi, Kanazawa 920-1192, Japan,* <sup>2</sup>*Department of Molecular Design and Engineering, Graduate School of Engineering, Nagoya University, Chikusa-ku, Nagoya 464-8603, Japan,* <sup>3</sup>*Nano Life Science Institute (WPI-NanoLSI), Kanazawa University, Kakuma-machi, Kanazawa 920-1192, Japan*

\* Correspondence: maeda@se.kanazawa-u.ac.jp, yashima@chembio.nagoya-u.ac.jp

## Table of Contents

|                                                                                                                                        |     |
|----------------------------------------------------------------------------------------------------------------------------------------|-----|
| 1. Materials                                                                                                                           | S3  |
| 2. Instruments                                                                                                                         | S3  |
| 3. Synthesis                                                                                                                           | S4  |
| 4. Polymerization                                                                                                                      | S7  |
| 5. Preparation of coated-type chiral packing materials using optically active poly- <b>1b</b> –poly- <b>4b</b><br>with helicity memory | S9  |
| 6. Immobilization of poly( <b>2b-co-5</b> ), poly( <b>3b-co-5</b> ) and poly( <b>4b-co-5</b> ) onto silica gel                         | S10 |
| 7. Preparation of HPLC columns                                                                                                         | S10 |
| 8. Reversible control of the macromolecular helicity of the immobilized polymers in the column                                         | S11 |
| 8-1. Helicity induction and its static memory of the immobilized polymers in the column                                                | S11 |
| 8-2. Reversible switching of the helical sense of the immobilized polymers in the column                                               | S11 |
| 9. Supporting data                                                                                                                     | S12 |
| 10. <sup>1</sup> H and <sup>13</sup> C NMR spectra of monomers and polymers                                                            | S32 |
| 11. Supporting references                                                                                                              | S42 |

## 1. Materials

Anhydrous THF and dichloromethane were obtained from Kanto Kagaku (Tokyo, Japan). Triethylamine (Et<sub>3</sub>N) was dried over KOH pellets and distilled onto KOH under nitrogen. These solvents were stored under nitrogen. 1-Bromoethane and *N,N*-dimethyl-4-aminopyridine (DMAP) were purchased from Wako (Osaka, Japan). Pentanoic acid, *n*-butyl isocyanate, *n*-dodecyl isocyanate, tetradecanedioic acid, trimethylsilyldiazomethane, tridecanoic acid, 1-ethyl-3-(3-dimethylaminopropyl)carbodiimide hydrochloride (EDC-HCl), methylcyclohexane (MCH) were from Tokyo Kasei (TCI, Tokyo, Japan). Potassium carbonate (K<sub>2</sub>CO<sub>3</sub>) and (*R*)- and (*S*)-1-phenylethanol ((*R*)- and (*S*)-**A**) were obtained from Kanto Kagaku. Anhydrous acetonitrile, norbornadiene rhodium chloride dimer ([Rh(nbd)Cl]<sub>2</sub>) and tetra-*n*-butylammonium fluoride (TBAF) (1.0 M in THF) were available from Aldrich (Milwaukee, WI, USA). The porous spherical silica gel with a mean particle size of 5 μm and a mean pore diameter of 30 nm (Daiso gel SP-300-5P) was kindly supplied from Daiso Chemicals (Osaka, Japan). ((2,2'-Bis(methoxymethoxy)-4'-hydroxy-4-biphenyl)ethynyl)triisopropylsilane (**5**),<sup>S1</sup> (2,2'-bis(methoxymethoxy)-4'-dodecyloxycarbonyl-4-biphenyl)acetylene (**2a**)<sup>S2</sup> and (2,2'-bis(methoxymethoxy)-4'-butoxycarbonyl-4-biphenyl)acetylene (**2b**)<sup>S3</sup> were prepared according to the previously reported method.

## 2. Instruments

Melting points were measured on a Yanako melting point apparatus and were uncorrected. NMR spectra were taken on a JNM-ECA 500 (JEOL, Tokyo, Japan) (500 MHz for <sup>1</sup>H, 125 MHz for <sup>13</sup>C) spectrometer in CDCl<sub>3</sub> using tetramethylsilane (TMS) as the internal standard. IR spectra were recorded with a JASCO (Hachioji, Japan) Fourier Transform IR-460 spectrophotometer. Size exclusion chromatography (SEC) measurements were performed with a JASCO PU-2080 liquid chromatograph equipped with a photodiode array detector (JASCO MD-2018) at 40 °C. The temperature was controlled with a JASCO CO-1560 column oven. A Shodex (Tokyo, Japan) KF-805L (30 cm) column was used for SEC measurements and THF was used as the eluent at flow rate of 1.0 mL/min. The molecular weight calibration curves were obtained with polystyrene standards (Tosoh, Tokyo, Japan). Absorption and circular dichroism (CD) spectra were measured in a 1.0 mm quartz cell on a JASCO V-570 spectrophotometer and a JASCO J-725 spectropolarimeter, respectively. The temperature was controlled with a JASCO ETC-505T (absorption spectroscopy) and a JASCO PTC-348WI apparatus (CD spectroscopy). The chromatographic separations of enantiomers were performed using a JASCO PU-2080 liquid chromatograph equipped with a photodiode array detector (JASCO MD-2018) and a CD detector (JASCO CD-2095) at ca. 10 °C. Thermogravimetric (TG) analysis was conducted on a SEIKO

EXSTAR6000 TG/DTA 6200 (Seiko Instruments Inc., Chiba, Japan) under a heating rate of 30 °C/min. Vibrational circular dichroism (VCD) spectra were measured in a 0.15 mm BaF<sub>2</sub> cell with a JASCO JV-2001YS spectrometer equipped with a temperature controller (EYELA NCB-1200) (EYELA, Tokyo, Japan). The concentration was 40 mg/mL in MCH and toluene, and temperature was *ca.* -10 °C. All spectra were collected for *ca.* 4 h at a resolution of 4 cm<sup>-1</sup>. Elemental analyses were performed by the Research Institute for Instrumental Analysis of Advanced Science Research Center, Kanazawa University, Kanazawa, Japan.

### 3. Synthesis

Biphenylacetylene monomers (**1b**, **3a**, **3b**, **4a**, **4b**) were prepared according to Scheme S1.

**Scheme S1.** Synthesis of **1b**, **3a**, **3b**, **4a** and **4b**.

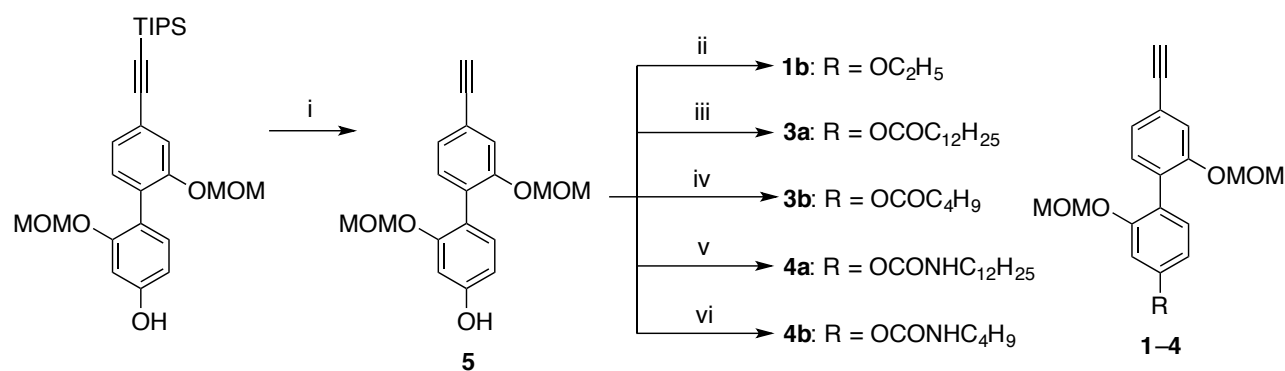

i) TBAF, THF, 0 °C, ii) 1-bromoethane, K<sub>2</sub>CO<sub>3</sub>, acetonitrile, reflux, iii) tridecanoic acid, DMAP, EDC-HCl, CH<sub>2</sub>Cl<sub>2</sub>, rt, iv) pentanoic acid, DMAP, EDC-HCl, CH<sub>2</sub>Cl<sub>2</sub>, rt, v) *n*-dodecyl isocyanate, Et<sub>3</sub>N, CH<sub>2</sub>Cl<sub>2</sub>, rt, vi) *n*-butyl isocyanate, Et<sub>3</sub>N, CH<sub>2</sub>Cl<sub>2</sub>, rt.

i) **(2,2'-Bis(methoxymethoxy)-4'-hydroxy-4-biphenyl)acetylene (5)** To a solution of ((2,2'-bis(methoxymethoxy)-4'-hydroxy-4-biphenyl)ethynyl)triisopropylsilane (3.03 g, 6.44 mmol) in THF (257 mL) was added TBAF (1.0 M in THF, 7.73 mL, 7.73 mmol). The mixture was stirred at 0 °C for 1 h and was diluted with ethyl acetate. The solution was washed with 1 N HCl aqueous solution and water, and then dried over Na<sub>2</sub>SO<sub>4</sub>. After filtration, the solvent was removed under reduced pressure and the crude product was then purified by silica gel chromatography using *n*-hexane—ethyl acetate (3/1, v/v) as the eluent to give the desired product as a pale yellow solid (1.98 g, 98% yield). Mp: 69.0–69.8 °C. IR (KBr, cm<sup>-1</sup>): 3276 (≡CH), 2105 (C≡C). <sup>1</sup>H NMR (500 MHz, CDCl<sub>3</sub>, rt): δ 7.34 (s, 1H, Ar-H), 7.19–7.18 (m, 2H, Ar-H), 7.08 (d, *J* = 8.2 Hz, 1H, Ar-H), 6.76 (d, *J* = 2.3 Hz, 1H, Ar-H), 6.54 (dd, *J* = 5.9,

2.3 Hz, 1H, Ar-H), 5.05 (d,  $J$  = 6.4 Hz, 4H, 2OCH<sub>2</sub>O), 4.78 (br-s, 1H, OH), 3.36 (d,  $J$  = 1.8 Hz, 6H, 2OCH<sub>3</sub>), 3.08 (s, 1H, C≡C-H). <sup>13</sup>C NMR (125 MHz, CDCl<sub>3</sub>, rt):  $\delta$  156.58, 156.10, 155.11, 132.23, 132.04, 130.26, 126.04, 122.29, 121.04, 119.40, 108.97, 103.52, 95.56, 95.44, 83.95, 77.23, 56.31, 56.27. Calcd for C<sub>18</sub>H<sub>18</sub>O<sub>5</sub>·(H<sub>2</sub>O)<sub>0.3</sub>: C, 67.62; H, 5.86. Found: C, 67.60; H, 5.78.

ii) **(2,2'-Bis(methoxymethoxy)-4'-ethoxy-4-biphenyl)acetylene (1b)** To a solution of **5** (200 mg, 0.64 mmol) in anhydrous acetonitrile (6.4 mL) was added K<sub>2</sub>CO<sub>3</sub> (265 mg, 1.92 mmol) and 1-bromoethane (0.096 mL, 1.28 mmol). After reflux for 5 h, the mixture was diluted with ethyl acetate. The solution was washed with 1 N HCl aqueous solution and water, and then dried over Na<sub>2</sub>SO<sub>4</sub>. After filtration, the solvent was removed under reduced pressure and the crude product was then purified by silica gel chromatography using *n*-hexane—ethyl acetate (15/1, v/v) as the eluent to give the desired product as a white solid (210 mg, 96% yield). Mp: 54.6–55.3 °C. IR (KBr, cm<sup>-1</sup>): 3246 (≡CH), 2100 (C≡C). <sup>1</sup>H NMR (500 MHz, CDCl<sub>3</sub>, rt):  $\delta$  7.34 (s, 1H, Ar-H), 7.19 (s, 2H, Ar-H), 7.12 (d,  $J$  = 8.6 Hz, 1H, Ar-H), 6.80 (d,  $J$  = 2.0 Hz, 1H, Ar-H), 6.61–6.59 (dd,  $J$  = 5.7, 2.3 Hz, 1H, Ar-H), 5.05 (d,  $J$  = 6.3 Hz, 4H, 2OCH<sub>2</sub>O), 4.06 (q,  $J$  = 6.9 Hz, 2H, COCH<sub>2</sub>), 3.35 (d,  $J$  = 9.2 Hz, 6H, 2OCH<sub>3</sub>), 3.08 (s, 1H, C≡C-H), 1.43 (t,  $J$  = 6.9 Hz, 3H, CH<sub>2</sub>CH<sub>3</sub>). <sup>13</sup>C NMR (125 MHz, CDCl<sub>3</sub>, rt):  $\delta$  159.74, 155.69, 154.80, 131.73, 131.59, 130.10, 125.67, 121.85, 120.55, 119.08, 107.11, 102.79, 95.21 (2C), 83.65, 77.27, 63.54, 55.95, 55.93, 14.85. Calcd for C<sub>20</sub>H<sub>22</sub>O<sub>5</sub>·(H<sub>2</sub>O)<sub>0.1</sub>: C, 69.79; H, 6.50. Found: C, 69.68; H, 6.56.

iii) **(2,2'-Bis(methoxymethoxy)-4'-dodecyloxyester-4-biphenyl)acetylene (3a)** The compound **5** (200 mg, 0.64 mmol), tridecanoic acid (165 mg, 0.77 mmol), DMAP (93.8 mg, 0.77 mmol) were dissolved in anhydrous dichloromethane (7.0 mL) and the solution was cooled to 0 °C. To this solution was added EDC-HCl (160 mg, 0.83 mmol) and the mixture was stirred at rt for 3 h. After evaporating the solvent, the mixture was diluted with ethyl acetate, washed with water, and then dried over Na<sub>2</sub>SO<sub>4</sub>. The solvent was removed under reduced pressure and the crude product was purified by silica gel chromatography using *n*-hexane—ethyl acetate (10/3, v/v) as the eluent to give the desired product as a pale white solid (282 mg, 87% yield). Mp: 47.8–48.6 °C. IR (KBr, cm<sup>-1</sup>): 3236 (≡CH), 2108 (C≡C), 1752 (C=O). <sup>1</sup>H NMR (500 MHz, CDCl<sub>3</sub>, rt):  $\delta$  7.35 (s, 1H, Ar-H), 7.21–7.17 (m, 3H, Ar-H), 6.97 (d,  $J$  = 2.4 Hz, 1H, Ar-H), 6.81 (dd,  $J$  = 6.2, 2.0 Hz, 1H, Ar-H), 5.06 (s, 4H, 2OCH<sub>2</sub>O), 3.35 (d,  $J$  = 1.7 Hz, 6H, 2OCH<sub>3</sub>), 3.08 (s, 1H, C≡C-H), 2.56 (t,  $J$  = 7.6 Hz, 2H, COCH<sub>2</sub>), 1.76 (quint,  $J$  = 7.6 Hz, 2H, CH<sub>2</sub>CH<sub>2</sub>), 1.43–1.27 (m, 18H, CH<sub>2</sub>CH<sub>2</sub>), 0.88 (t,  $J$  = 6.5 Hz, 3H, CH<sub>2</sub>CH<sub>3</sub>). <sup>13</sup>C NMR (125 MHz, CDCl<sub>3</sub>, rt):  $\delta$  172.27, 155.41, 154.73, 151.08, 131.51, 131.46, 129.45, 125.67, 125.54, 122.37, 118.94, 114.77, 109.06, 95.18, 95.14, 83.52, 77.24, 55.99 (2C), 34.44, 31.93, 29.66, 29.64, 29.62, 29.48, 29.37, 29.29,

29.15, 24.91, 22.70, 14.14. Calcd for C<sub>31</sub>H<sub>42</sub>O<sub>6</sub>: C, 72.91; H, 8.29. Found: C, 72.78; H, 8.37.

iv) **(2,2'-Bis(methoxymethoxy)-4'-pentanoyloxyester-4-biphenyl)acetylene (3b)** The compound **5** (200 mg, 0.64 mmol), pentanoic acid (78.3 mg, 0.77 mmol) and DMAP (93.8 mg, 0.77 mmol) were dissolved in anhydrous dichloromethane (20 mL) and the solution was cooled to 0 °C. To this solution was added EDC-HCl (148 mg, 0.77 mmol) and the mixture was stirred at rt for 3 h. After evaporating the solvent, the mixture was diluted with ethyl acetate, and the solution was washed with water, and then dried over Na<sub>2</sub>SO<sub>4</sub>. The solvent was removed under reduced pressure and the crude product was purified by silica gel chromatography using *n*-hexane—ethyl acetate (7/2, v/v) as the eluent to give the desired product as a pale white solid (246 mg, 97% yield). Mp: 45.3–46.3 °C. IR (KBr, cm<sup>-1</sup>): 3259 (≡CH), 2103 (C≡C), 1761 (C=O). <sup>1</sup>H NMR (500 MHz, CDCl<sub>3</sub>, rt): δ 7.35 (s, 1H, Ar-H), 7.21–7.16 (m, 3H, Ar-H), 6.97 (d, *J* = 2.3 Hz, 1H, Ar-H), 6.81 (dd, *J* = 6.0, 2.3 Hz, 1H, Ar-H), 5.06 (s, 4H, 2OCH<sub>2</sub>O), 3.35 (d, *J* = 1.4 Hz, 6H, 2OCH<sub>3</sub>), 3.09 (s, 1H, C≡C-H), 2.56 (t, *J* = 7.8 Hz, 2H, COCH<sub>2</sub>), 1.75 (quint, *J* = 7.3 Hz, 2H, CH<sub>2</sub>CH<sub>2</sub>), 1.46 (sex, *J* = 7.8 Hz, 2H, CH<sub>2</sub>CH<sub>2</sub>), 0.98 (t, *J* = 7.3 Hz, 3H, CH<sub>2</sub>CH<sub>3</sub>). <sup>13</sup>C NMR (125 MHz, CDCl<sub>3</sub>, rt): δ 172.24, 155.41, 154.72, 151.07, 131.50, 131.46, 129.45, 125.66, 125.55, 122.36, 118.94, 114.79, 109.04, 95.18, 95.14, 83.52, 77.21, 55.99 (2C), 34.14, 26.96, 22.27, 13.75. Calcd for C<sub>23</sub>H<sub>26</sub>O<sub>6</sub>: C, 69.33; H, 6.58. Found: C, 69.33; H, 6.65.

v) **(2,2'-Bis(methoxymethoxy)-4'-dodecylcarbamoyloxy-4-biphenyl)acetylene (4a)** To a solution of **5** (100 mg, 0.32 mmol) in anhydrous diethyl ether (3.0 mL) was added Et<sub>3</sub>N (4 drops) and *n*-dodecyl isocyanate (0.15 mL, 0.64 mmol). After stirring at rt for 3 h, the mixture was diluted with ethyl acetate, and the solution was washed with 1 N HCl aqueous solution and water, and then dried over Na<sub>2</sub>SO<sub>4</sub>. After evaporating the solvent, the crude product was purified by silica gel chromatography using *n*-hexane—ethyl acetate (5/1, v/v) as the eluent to give the desired product as a white solid (160 mg, 96% yield). Mp: 65.3–66.1 °C. IR (KBr, cm<sup>-1</sup>): 3363 (N-H), 3286 (≡CH), 2106 (C≡C), 1711 (C=O). <sup>1</sup>H NMR (CDCl<sub>3</sub>, 500 MHz, rt): δ 7.35 (s, 1H, Ar-H), 7.21–7.16 (m, 3H, Ar-H), 7.02 (d, *J* = 2.3 Hz, 1H, Ar-H), 6.86 (dd, *J* = 6.0, 2.3 Hz, 1H, Ar-H), 5.06 (s, 4H, 2OCH<sub>2</sub>O), 5.00 (t, *J* = 5.5 Hz, 1H, CONH), 3.35 (d, *J* = 2.3 Hz, 6H, 2OCH<sub>3</sub>), 3.27 (q, *J* = 6.4 Hz, 2H, NHCH<sub>2</sub>), 3.08 (s, 1H, C≡C-H), 1.58 (quint, *J* = 6.9 Hz, 2H, CH<sub>2</sub>CH<sub>2</sub>), 1.34–1.27 (m, 18H, CH<sub>2</sub>CH<sub>2</sub>), 0.88 (t, *J* = 6.9 Hz, 3H, CH<sub>2</sub>CH<sub>3</sub>). <sup>13</sup>C NMR (125 MHz, CDCl<sub>3</sub>, rt): δ 155.26, 154.73, 154.39, 151.40, 131.53, 131.33, 129.57, 125.63, 125.04, 122.25, 118.90, 114.82, 109.12, 95.11 (2C), 83.55, 77.13, 55.98 (2C), 41.31, 31.91, 29.83, 29.63, 29.66, 29.59, 29.55, 29.34, 29.29, 26.77, 22.69, 14.13. Calcd for C<sub>31</sub>H<sub>43</sub>NO<sub>6</sub>: C, 70.83; H, 8.25; N, 2.66. Found: C, 70.80; H,

8.33; N, 2.71.

vi) **(2,2'-Bis(methoxymethoxy)-4'-butylcarbamoxyloxy-4-biphenyl)acetylene (4b)** To a solution of **5** (1.87 g, 5.95 mmol) in anhydrous diethyl ether (60 mL) was added Et<sub>3</sub>N (1.2 mL) and *n*-butyl isocyanate (0.80 mL, 7.13 mmol). After stirring at rt for 3 h, the mixture was diluted with ethyl acetate, and the solution was washed with 1 N HCl aqueous solution and water, and then dried over Na<sub>2</sub>SO<sub>4</sub>. After evaporating the solvent, the crude product was purified by silica gel chromatography using *n*-hexane—ethyl acetate (5/1, v/v) as the eluent to give the desired product as a white solid (2.08 g, 85% yield). Mp: 85.3–86.1 °C. IR (KBr, cm<sup>-1</sup>): 3363 (N-H), 3241 (≡CH), 2106 (C≡C), 1712 (C=O). <sup>1</sup>H NMR (CDCl<sub>3</sub>, 500 MHz, rt): δ 7.35 (s, 1H, Ar-H), 7.21–7.16 (m, 3H, Ar-H), 7.02 (d, *J* = 1.8 Hz, 1H, Ar-H), 6.86 (dd, *J* = 8.5, 2.1 Hz, 1H, Ar-H), 5.06 (s, 4H, 2OCH<sub>2</sub>O), 5.00 (t, *J* = 5.4 Hz, 1H, CONH), 3.35 (d, *J* = 2.8 Hz, 6H, 2OCH<sub>3</sub>), 3.29 (q, *J* = 7.2 Hz, 2H, NHCH<sub>2</sub>), 3.08 (s, 1H, C≡C-H), 1.57 (quint, *J* = 7.2 Hz, 2H, CH<sub>2</sub>CH<sub>2</sub>), 1.41 (sex, *J* = 7.6 Hz, 2H, CH<sub>2</sub>CH<sub>2</sub>), 0.97 (t, *J* = 7.6 Hz, 3H, CH<sub>2</sub>CH<sub>3</sub>). <sup>13</sup>C NMR (125 MHz, CDCl<sub>3</sub>, rt): δ 155.22, 154.70, 154.40, 151.37, 131.51, 131.30, 129.53, 125.60, 125.02, 122.22, 118.85, 114.80, 109.08, 95.09, 95.08, 83.52, 77.13, 55.95, 53.42, 40.95, 31.87, 19.89, 13.72. Calcd for C<sub>23</sub>H<sub>27</sub>NO<sub>6</sub>: C, 66.81; H, 6.58; N, 3.39. Found: C, 66.59; H, 6.63; N, 3.34.

#### 4. Polymerization

*Cis-transoidal* stereoregular poly-**2a**<sup>S2</sup> and poly-**2b**<sup>S3</sup> were prepared according to the previously reported method.<sup>S4</sup> The number-average molecular weight (*M*<sub>n</sub>) and its distribution (*M*<sub>w</sub>/*M*<sub>n</sub>) were estimated to be 8.5 × 10<sup>5</sup> and 1.9 (poly-**2a**) and 9.4 × 10<sup>5</sup> and 1.7 (poly-**2b**), respectively, by size exclusion chromatography (SEC) with polystyrene standards in THF. Homopolymerization of **1b**, **3** and **4** and copolymerization of **5** with **2b**, **3b** and **4b** were carried out in a dry glass ampule under a dry nitrogen atmosphere using [Rh(nbd)Cl]<sub>2</sub> as a catalyst in the same way as reported previously (Scheme S2).<sup>S1-4</sup> The results of the homopolymerization and copolymerization are summarized in Table 1 and Table 3, respectively.

**Scheme S2.** Synthesis of poly**1b**, poly-**3**, poly-**4**, poly(**2b-co-5**), poly(**3b-co-5**) and poly(**4b-co-5**)

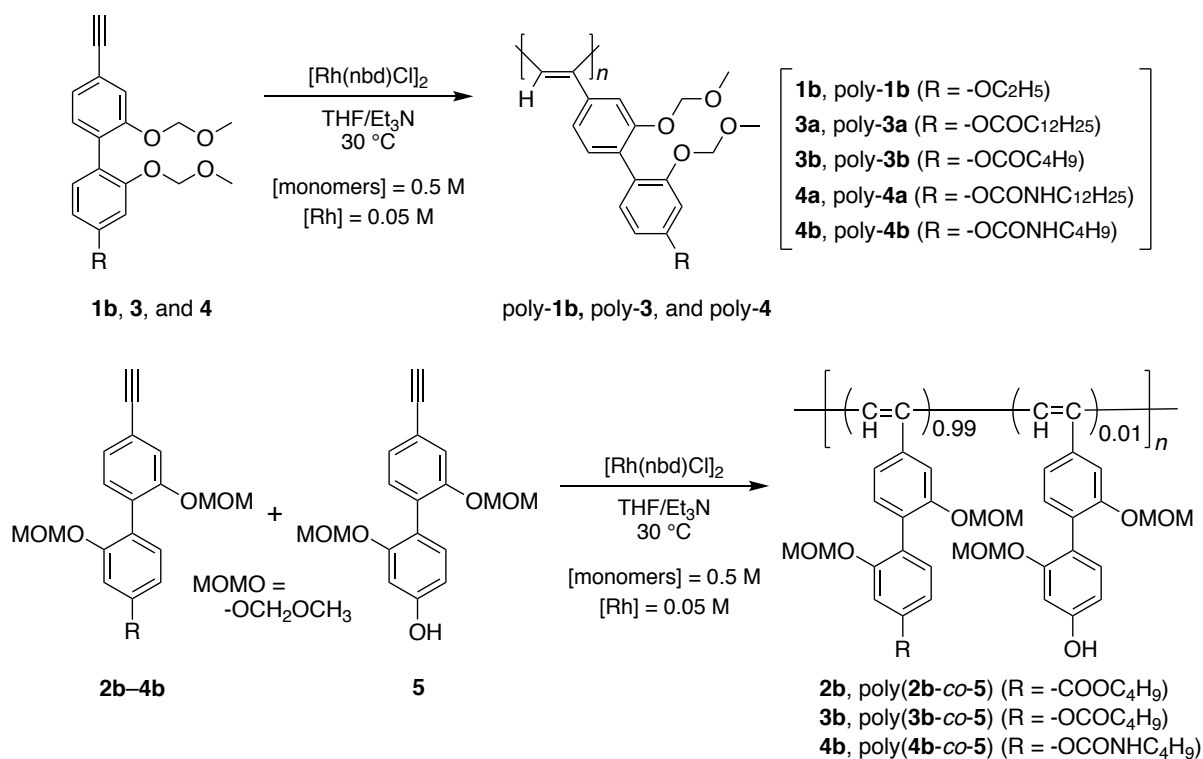

Spectroscopic data of poly-**1b**. <sup>1</sup>H NMR (500 MHz, CDCl<sub>3</sub>, 55 °C):  $\delta$  6.95–6.30 (br, 6H, Ar–H), 6.10–5.90 (br, 1H, C=CH), 4.85–4.60 (br, 4H, 2OCH<sub>2</sub>O), 4.00–3.80 (br, 2H, OCH<sub>2</sub>), 3.20–2.90 (br, 6H, 2OCH<sub>3</sub>), 1.40–1.20 (br, 3H, CH<sub>2</sub>CH<sub>3</sub>). Calcd for C<sub>20</sub>H<sub>22</sub>O<sub>5</sub>·(H<sub>2</sub>O)<sub>0.1</sub>: C, 69.79; H, 6.50. Found: C, 69.75; H, 6.52.

Spectroscopic data of poly-**3a**. IR (KBr, cm<sup>-1</sup>): 1760 (C=O). <sup>1</sup>H NMR (500 MHz, CDCl<sub>3</sub>, 55 °C):  $\delta$  6.95–6.40 (br, 6H, Ar–H), 6.20–5.95 (br, 1H, C=CH), 4.88–4.60 (br, 4H, 2OCH<sub>2</sub>O), 3.15–2.90 (br, 6H, 2OCH<sub>3</sub>), 2.55–2.35 (br, 2H, OCH<sub>2</sub>), 1.80–1.64 (br, 2H, CH<sub>2</sub>CH<sub>2</sub>), 1.45–1.20 (br, 18H, CH<sub>2</sub>CH<sub>2</sub>), 0.93–0.85 (br, 3H, CH<sub>2</sub>CH<sub>3</sub>). Calcd for C<sub>31</sub>H<sub>42</sub>O<sub>6</sub>·(H<sub>2</sub>O)<sub>0.1</sub>: C, 72.66; H, 8.30. Found: C, 72.53; H, 8.28.

Spectroscopic data of poly-**3b**. IR (KBr, cm<sup>-1</sup>): 1758 (C=O). <sup>1</sup>H NMR (500 MHz, CDCl<sub>3</sub>, 55 °C):  $\delta$  6.96–6.36 (br, 6H, Ar–H), 6.05–5.90 (br, 1H, C=CH), 4.91–4.55 (br, 4H, 2OCH<sub>2</sub>O), 3.20–2.89 (br, 6H, 2OCH<sub>3</sub>), 2.55–2.40 (br, 2H, OCH<sub>2</sub>), 1.75–1.64 (br, 2H, CH<sub>2</sub>CH<sub>2</sub>), 1.47–1.36 (br, 2H, CH<sub>2</sub>CH<sub>2</sub>), 1.00–0.90 (br, 3H, CH<sub>2</sub>CH<sub>3</sub>). Calcd for C<sub>23</sub>H<sub>26</sub>O<sub>6</sub>: C, 69.33; H, 6.58. Found: C, 69.06; H, 6.55.

Spectroscopic data of poly-**4a**. IR (KBr, cm<sup>-1</sup>): 3406 (N–H), 1734 (C=O). <sup>1</sup>H NMR (500 MHz, CDCl<sub>3</sub>, 55 °C):  $\delta$  7.0–6.30 (br, 6H, Ar–H), 6.05–5.85 (br, 1H, C=CH), 5.30–5.10 (br, 1H, NH), 4.90–4.45 (br, 4H, 2OCH<sub>2</sub>O), 3.30–2.85 (br, 2H, NHCH<sub>2</sub>), (br, 6H, 2OCH<sub>3</sub>), 1.63–1.45 (br, 2H, CH<sub>2</sub>CH<sub>2</sub>), 1.40–1.10



(br, 18H, CH<sub>2</sub>CH<sub>2</sub>), 0.93–0.80 (br, 3H, CH<sub>2</sub>CH<sub>3</sub>). Calcd for C<sub>31</sub>H<sub>43</sub>NO<sub>6</sub>·(H<sub>2</sub>O)<sub>0.1</sub>: C, 70.59; H, 8.26; N, 2.66. Found: C, 70.46; H, 8.33; N, 2.63.

Spectroscopic data of poly-**4b**. IR (KBr, cm<sup>-1</sup>): 3347 (N-H), 1743 (C=O). <sup>1</sup>H NMR (500 MHz, CDCl<sub>3</sub>, 55 °C): δ 7.05–6.30 (br, 6H, Ar-H), 6.10–5.85 (br, 1H, C=CH), 5.35–5.05 (br, 1H, NH), 5.00–4.40 (br, 4H, 2OCH<sub>2</sub>O), 3.40–2.80 (br, 2H, NHCH<sub>2</sub>), (br, 6H, 2OCH<sub>3</sub>), 1.60–1.30 (br, 4H, CH<sub>2</sub>CH<sub>2</sub>), 1.0–0.90 (br, 3H, CH<sub>2</sub>CH<sub>3</sub>). Calcd for C<sub>23</sub>H<sub>27</sub>NO<sub>6</sub>·(H<sub>2</sub>O)<sub>0.1</sub>: C, 66.52; H, 6.60; N, 3.37. Found: C, 66.31; H, 6.71; N, 3.35.

Spectroscopic data of poly(**2b-co-5**). IR (KBr, cm<sup>-1</sup>): 1717 (C=O). <sup>1</sup>H NMR (500 MHz, CDCl<sub>3</sub>, 55 °C): δ 7.80–6.40 (br, 6H, Ar-H), 6.10–5.95 (br, 1H, C=CH), 4.95–4.60 (br, 4H, 2OCH<sub>2</sub>O), 4.35–4.15 (br, 2H, OCH<sub>2</sub>), 3.15–2.90 (br, 6H, 2OCH<sub>3</sub>), 1.75–1.64 (br, 2H, CH<sub>2</sub>CH<sub>2</sub>), 1.48–1.36 (br, 2H, CH<sub>2</sub>CH<sub>2</sub>), 0.98–0.89 (br, 3H, CH<sub>2</sub>CH<sub>3</sub>). Calcd for C<sub>23</sub>H<sub>26</sub>O<sub>6</sub>·(H<sub>2</sub>O)<sub>0.2</sub>: C, 68.70; H, 6.60. Found: C, 68.76; H, 6.59

Spectroscopic data of poly(**3b-co-5**). IR (KBr, cm<sup>-1</sup>): 1758 (C=O). <sup>1</sup>H NMR (500 MHz, CDCl<sub>3</sub>, 55 °C): δ 6.96–6.30 (br, 6H, Ar-H), 6.05–5.90 (br, 1H, C=CH), 4.90–4.55 (br, 4H, 2OCH<sub>2</sub>O), 3.20–2.86 (br, 6H, 2OCH<sub>3</sub>), 2.55–2.35 (br, 2H, OCH<sub>2</sub>), 1.75–1.62 (br, 2H, CH<sub>2</sub>CH<sub>2</sub>), 1.48–1.37 (br, 2H, CH<sub>2</sub>CH<sub>2</sub>), 1.00–0.90 (br, 3H, CH<sub>2</sub>CH<sub>3</sub>). Calcd for C<sub>23</sub>H<sub>26</sub>O<sub>6</sub>·(H<sub>2</sub>O)<sub>0.1</sub>: C, 69.01; H, 6.59. Found: C, 68.94; H, 6.61.

Spectroscopic data of poly(**4b-co-5**). IR (KBr, cm<sup>-1</sup>): 3347 (N-H), 1743 (C=O). <sup>1</sup>H NMR (500 MHz, CDCl<sub>3</sub>, 55 °C): δ 7.10–6.30 (br, 6H, Ar-H), 6.10–5.90 (br, 1H, C=CH), 5.35–5.10 (br, 1H, NH), 5.00–4.50 (br, 4H, 2OCH<sub>2</sub>O), 3.40–2.80 (br, 2H, NHCH<sub>2</sub>), (br, 6H, 2OCH<sub>3</sub>), 1.60–1.30 (br, 4H, CH<sub>2</sub>CH<sub>2</sub>), 1.0–0.90 (br, 3H, CH<sub>2</sub>CH<sub>3</sub>). Calcd for C<sub>23</sub>H<sub>27</sub>NO<sub>6</sub>·(H<sub>2</sub>O)<sub>0.1</sub>: C, 66.54; H, 6.59; N, 3.34. Found: C, 66.48; H, 6.59; N, 3.34.

## 5. Preparation of coated-type chiral packing materials using optically active poly-**1b**–poly-**4b** with helicity memory

As-prepared, optically inactive poly-**1b**–poly-**3b** and poly-**4b** (60 mg) dissolved in a mixture of toluene/(*R*)-**A** (80/20, v/v, 2 mL) and THF/(*R*)-**A** (60/40, v/v; 2 mL), respectively, were allowed to stand at 25 °C for 48 h to completely induce an almost one-handed helical conformation. The resulting polymer solutions were then coated on macroporous silica gel (390 mg) according to the previously reported method,<sup>S5</sup> and the solvents were evaporated under reduced pressure. The contents of the polymers on silica gel were estimated to be ca. 13 wt% by thermogravimetric (TG) analysis.

## 6. Immobilization of poly(**2b-co-5**), poly(**3b-co-5**) and poly(**4b-co-5**) onto silica gel

A typical procedure for immobilization of poly(**2b-co-5**) onto silica gel is described as follows. As-prepared poly(**2b-co-5**) (90 mg) dissolved in THF (2.5 mL) was coated on macroporous silica gel (585 mg) in a similar way to that described in Section 5. The poly(**2b-co-5**)-coated silica gel (630 mg) was then dispersed in DMSO (12.6 mL). To this was added tetradecanedioic acid (**6**) (282 mg, 1.09 mmol) and DMAP (267 mg, 2.20 mmol) under a nitrogen atmosphere. After cooling to 0 °C, EDC-HCl (422 mg, 2.20 mmol) was then added to the suspended mixture, which was shaken at rt for 5 h. After filtration, the resulting silica gel was washed with THF (300 mL), dichloromethane (300 mL) and ethanol (300 mL) to remove non-immobilized poly(**2b-co-5**) and unreacted/partially reacted **6**, and dried in vacuo at rt overnight. The silica gel was then treated with trimethylsilyldiazomethane (2.0 M in diethyl ether, 0.37 mL, 0.74 mmol) in methanol (20 mL) at rt for 5 h under a nitrogen atmosphere to convert the **6**-derived carboxy groups remaining in the cross-linked polymer (Si-poly(**2b-co-5**)) immobilized onto silica gel into methyl esters. The Si-poly(**2b-co-5**)-based immobilized-type packing material thus obtained was collected by filtration, washed with THF (300 mL), dichloromethane (300 mL), ethanol (300 mL), toluene/*rac*-**A** (50/50, v/v, 20 mL) and *n*-hexane (300 mL), and then dried in vacuo at rt overnight. In the same way, the Si-poly(**3b-co-5**)- and Si-poly(**4b-co-5**)-based immobilized-type packing materials were prepared. The contents of the cross-linked polymers (Si-poly(**2b-co-5**), Si-poly(**3b-co-5**) and Si-poly(**4b-co-5**)) immobilized onto silica gel were estimated to be 9.9, 10 and 9.2 wt%, respectively, by TG analysis.

**Table S1.** Immobilization results of the poly(**2-co-5**), poly(**3-co-5**) and poly(**4-co-5**)

| run | sample code               | copolymer              | coating amount <sup>a</sup><br>(wt%) | immobilized amount <sup>a</sup><br>(wt%) | immobilization efficiency<br>(%) |
|-----|---------------------------|------------------------|--------------------------------------|------------------------------------------|----------------------------------|
| 1   | Si-poly( <b>2b-co-5</b> ) | poly( <b>2b-co-5</b> ) | 13                                   | 9.9                                      | 76                               |
| 2   | Si-poly( <b>3b-co-5</b> ) | poly( <b>3b-co-5</b> ) | 13                                   | 10                                       | 77                               |
| 3   | Si-poly( <b>4b-co-5</b> ) | poly( <b>4b-co-5</b> ) | 13                                   | 9.2                                      | 71                               |

<sup>a</sup> Determined by TG analysis.

## 7. Preparation of HPLC columns

After the packing materials were fractionated with sieves, the fractionated packing materials were then packed into a stainless-steel column (25 cm × 0.20 cm (i.d.)) by a conventional high-pressure slurry packing technique using an ECONO-PACKER MODEL CPP-085 (Chemco, St Louis, MO).<sup>S6</sup> The numbers of theoretical plates of all the coated- and immobilized-type columns were estimated to be ca. 3000 for benzene using an *n*-hexane–2-propanol (97/3, v/v) mixture as the eluent at a flow rate of 0.2

mL/min at ca. 10 °C. The hold-up time ( $t_0$ ) was estimated using 1,3,5-tri-*tert*-butylbenzene as the non-retained compound.<sup>S7</sup>

## 8. Reversible control of the macromolecular helicity of the immobilized polymers in the column

A typical procedure for the reversible control of the macromolecular helicity of the Si-poly(**3b-co-5**) immobilized onto silica gel in the column is described as follows.

### 8-1. Helicity induction and its static memory of the immobilized polymers in the column

The Si-poly(**3b-co-5**)-based immobilized-type column was filled with (*R*)-**A** in toluene ((*R*)-**A**/toluene = 50/50, v/v) and allowed to stand at 25 °C for 24 h to induce a preferred-handed helicity (*P*-helix) in the immobilized Si-poly(**3b-co-5**) backbone in the column. The toluene solution of (*R*)-**A** in the column was then completely replaced with a mixture of *n*-hexane/2-propanol (97/3, v/v) by flowing an excess amount of hexane/2-propanol (97/3, v/v) at ca. 10 °C for 120 min at a flow rate of 0.05 mL/min, which resulted in a CSP consisting of *P*-Si-poly(**3b-co-5**) with right-handed helicity memory. The chiral recognition ability of *P*-Si-poly(**3b-co-5**) was then investigated by HPLC under normal-phase conditions (eluent, hexane/2-propanol (97/3, v/v); flow rate, 0.2 mL/min; temperature, ca. 10 °C).

### 8-2. Reversible switching of the helical sense of the immobilized polymers in the column

The *P*-Si-poly(**3b-co-5**)-based immobilized-type column was filled with dichloromethane and allowed to stand at 25 °C for 2 h to erase the helicity memory. After removing the dichloromethane in the column in vacuo at rt, the column was filled with (*S*)-**A** in toluene ((*S*)-**A**/toluene = 50/50, v/v) and allowed to stand at 25 °C for 24 h to induce the left-handed helicity in the immobilized Si-poly(**3b-co-5**) backbone in the column, whose helical handedness was opposite to that of *P*-Si-poly(**3b-co-5**). By replacing the toluene solution of (*S*)-**A** in the column with a mixture of *n*-hexane/2-propanol (97/3, v/v) in the same way as described above, a CSP consisting of *M*-Si-poly(**3b-co-5**) with left-handed helicity memory was obtained. The column packed with *M*-Si-poly(**3b-co-5**) was further treated with dichloromethane followed by (*R*)-**A** in toluene ((*R*)-**A**/toluene = 50/50, v/v) and then replacement with a mixture of *n*-hexane/2-propanol (97/3, v/v) in the same way, to give a CSP composed of *P'*-Si-poly(**3b-co-5**) with a right-handed helicity memory.

In the same way, the reversible switching of the macromolecular helicity memory of the Si-poly(**2b-co-5**)- and Si-poly(**4b-co-5**)-based immobilized-type columns was performed.

## 9. Supporting data

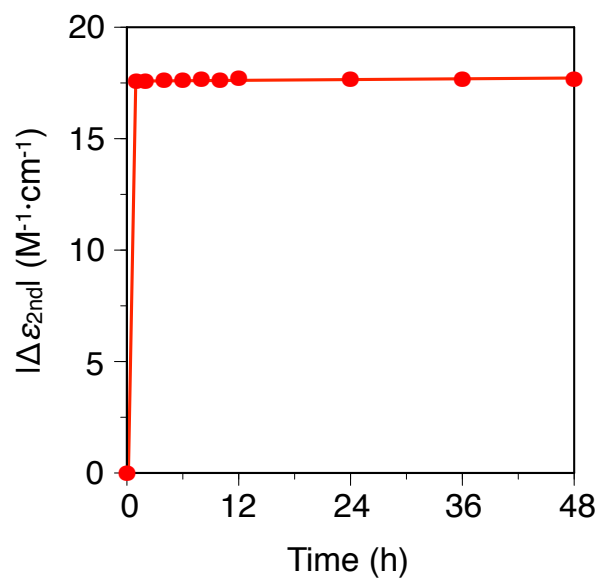

**Fig. S1.** Time-dependent CD intensity ( $|\Delta\epsilon_{2nd}|$ ) change of poly-**1a** in toluene/(*R*)-**A** (80/20, v/v) at 25 °C. [Poly-**1a**] = 1.0 mM.

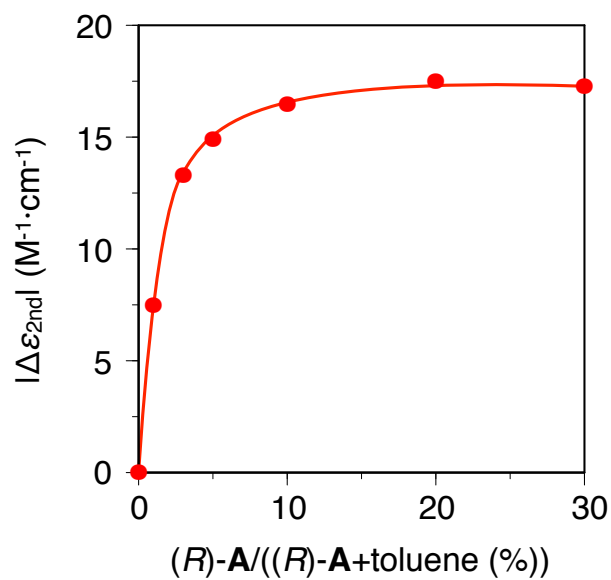

**Fig. S2.** CD titration curve ( $|\Delta\epsilon_{2nd}|$ ) of poly-**1a** with (*R*)-**A** in toluene at 25 °C after standing at 25 °C for 48 h. [Poly-**1a**] = 1.0 mM.

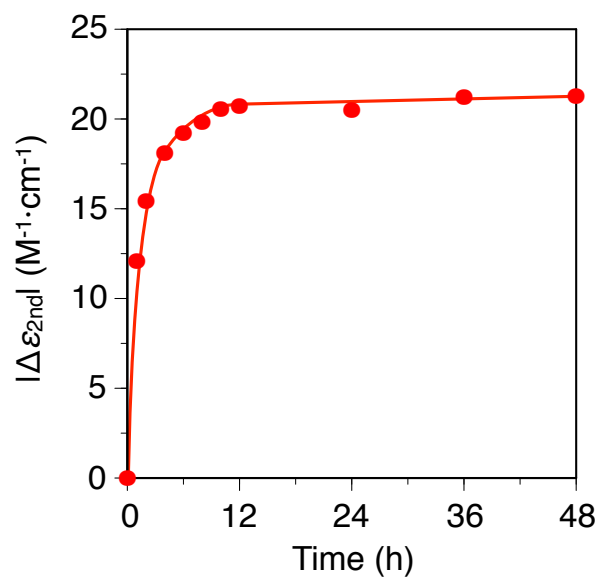

**Fig. S3.** Time-dependent CD intensity ( $|\Delta\epsilon_{2nd}|$ ) change of poly-**2a** in toluene/(*R*)-**A** (80/20, v/v) at 25 °C. [Poly-**2a**] = 1.0 mM.

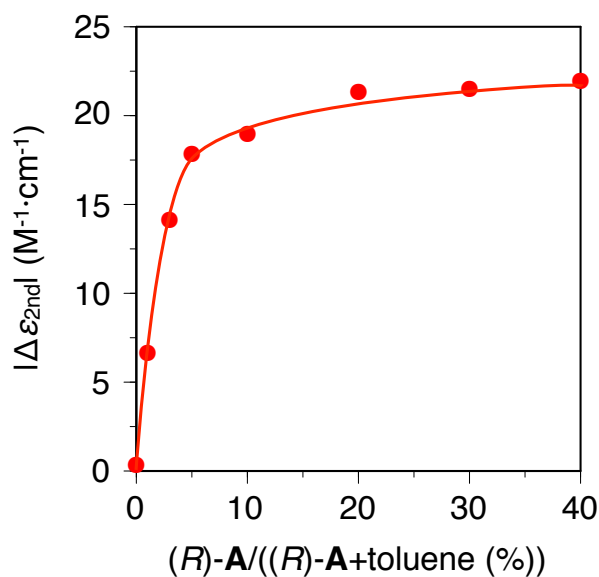

**Fig. S4.** CD titration curve ( $|\Delta\epsilon_{2nd}|$ ) of poly-**2a** with (*R*)-**A** in toluene at 25 °C after standing at 25 °C for 48 h. [Poly-**2a**] = 1.0 mM.

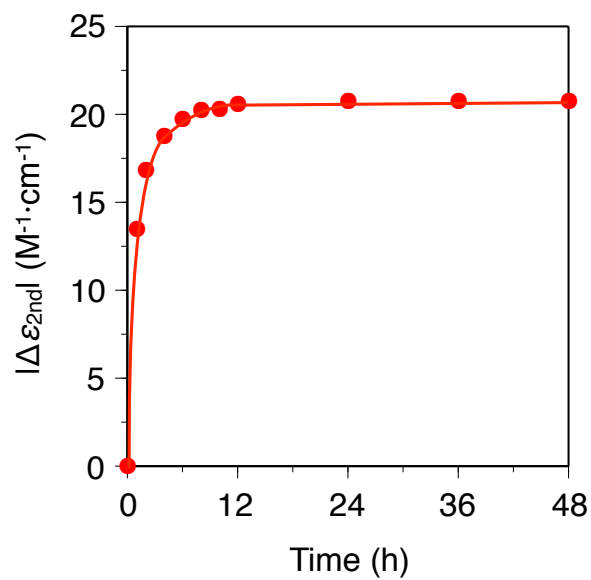

**Fig. S5.** Time-dependent CD intensity ( $|\Delta\epsilon_{2nd}|$ ) change of poly-3a in toluene/(*R*)-A (80/20, v/v) at 25 °C. [Poly-3a] = 1.0 mM.

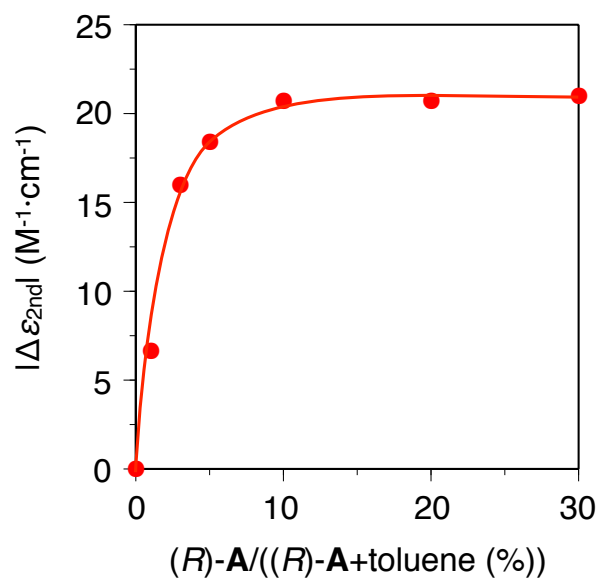

**Fig. S6.** CD titration curve ( $|\Delta\epsilon_{2nd}|$ ) of poly-3a with (*R*)-A in toluene at 25 °C after standing at 25 °C for 48 h. [Poly-3a] = 1.0 mM.

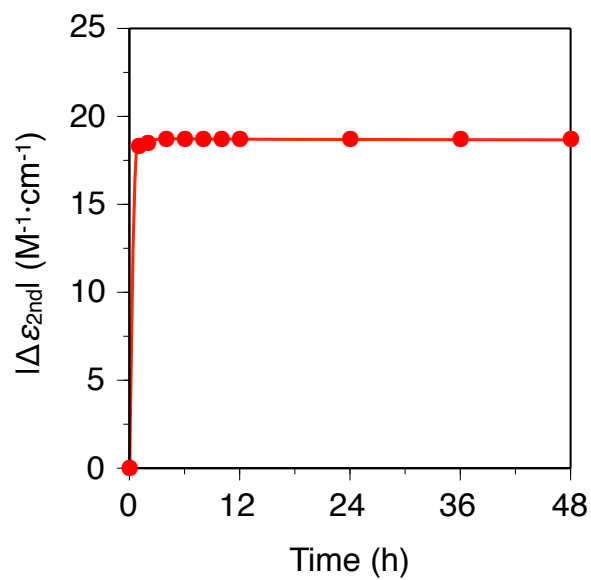

**Fig. S7.** Time-dependent CD intensity ( $|\Delta\epsilon_{2nd}|$ ) change of poly-**4a** in toluene/(*R*)-**A** (80/20, v/v) at 25 °C. [Poly-**4a**] = 1.0 mM.

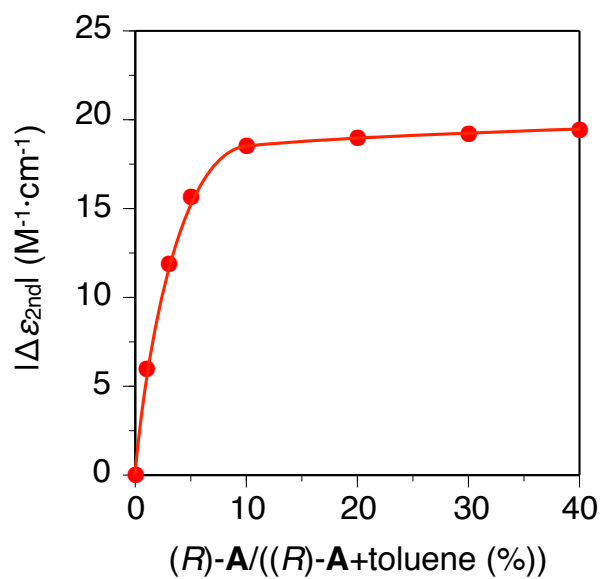

**Fig. S8.** CD titration curve ( $|\Delta\epsilon_{2nd}|$ ) of poly-**4a** with (*R*)-**A** in toluene at 25 °C after standing at 25 °C for 48 h. [Poly-**4a**] = 1.0 mM.

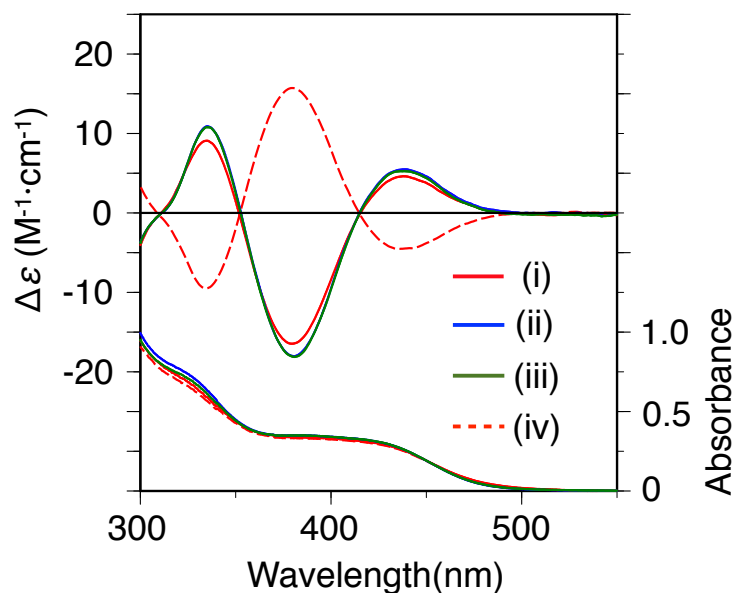

**Fig. S9.** CD and absorption spectra of poly-**1b** in toluene with (*R*)-**A** (toluene/(*R*)-**A** = 80/20, v/v) at 25 °C (i) and –10 °C (ii) after standing at 25 °C for 48 h, and the isolated poly-**1b** from ii (iii) measured in toluene at –10 °C. CD and absorption spectra of poly-**1b** in toluene with (*S*)-**A** (toluene/(*S*)-**A** = 80/20, v/v) at 25 °C (iv) after standing at 25 °C for 48 h are also shown. [Poly-**1b**] = 1.0 mM.

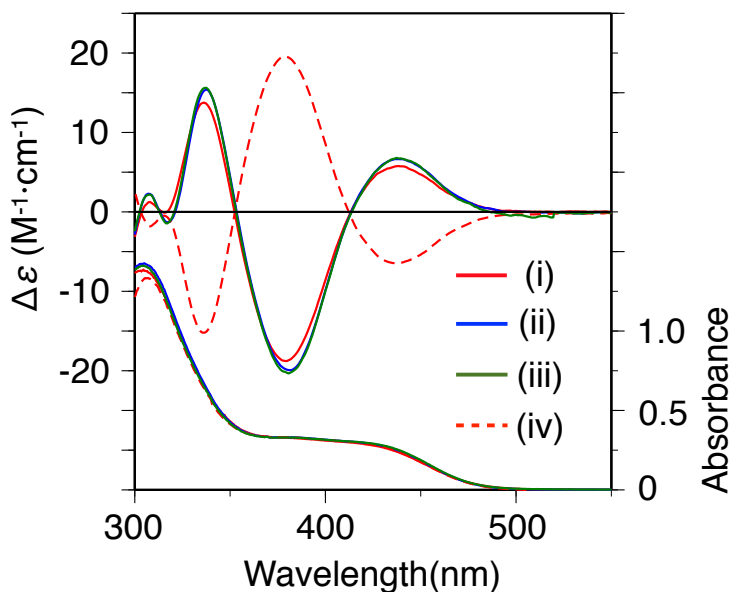

**Fig. S10.** CD and absorption spectra of poly-**2b** in toluene with (*R*)-**A** (toluene/(*R*)-**A** = 80/20, v/v) at 25 °C (i) and –10 °C (ii) after standing at 25 °C for 48 h, and the isolated poly-**2b** from ii (iii) measured in toluene at –10 °C. CD and absorption spectra of poly-**2b** in toluene with (*S*)-**A** (toluene/(*S*)-**A** = 80/20, v/v) at 25 °C (iv) after standing at 25 °C for 48 h are also shown. [Poly-**2b**] = 1.0 mM.



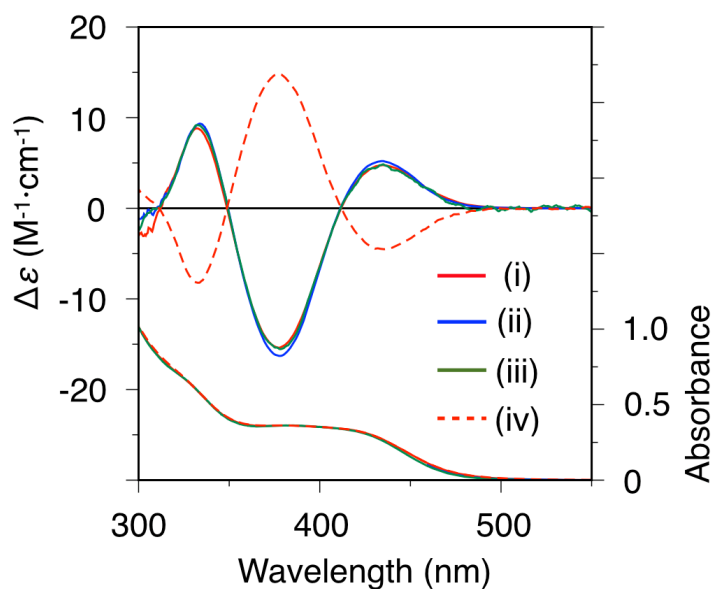

**Fig. S11.** CD and absorption spectra of poly-**3b** in toluene with (*R*)-**A** (toluene/(*R*)-**A** = 80/20, v/v) at 25 °C (i) and –10 °C (ii) after standing at 25 °C for 48 h, and the isolated poly-**3b** from ii (iii) measured in toluene at –10 °C. CD and absorption spectra of poly-**3b** in toluene with (*S*)-**A** (toluene/(*S*)-**A** = 80/20, v/v) at 25 °C (iv) after standing at 25 °C for 48 h are also shown. [Poly-**3b**] = 1.0 mM.

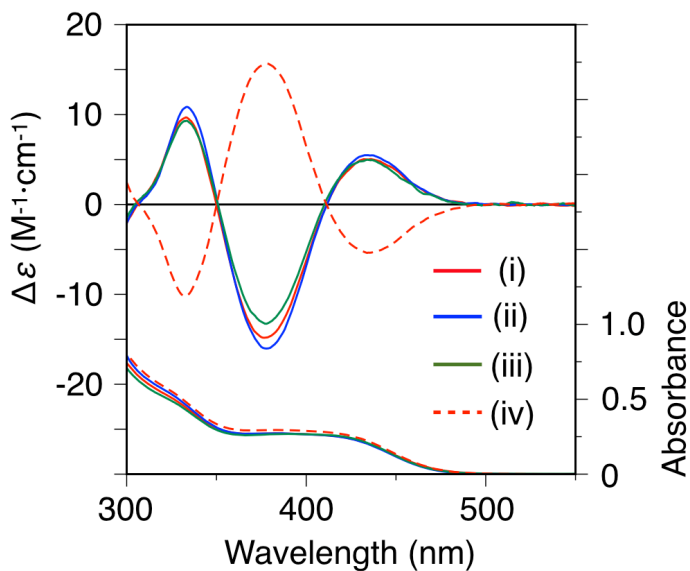

**Fig. S12.** CD and absorption spectra of poly-**4b** in THF with (*R*)-**A** (THF/(*R*)-**A** = 60/40, v/v) at 25 °C (i) and –10 °C (ii) after standing at 25 °C for 48 h, and the isolated poly-**4b** from ii (iii) measured in THF at –10 °C. CD and absorption spectra of poly-**4b** in THF with (*S*)-**A** (THF/(*S*)-**A** = 60/40, v/v) at 25 °C (iv) after standing at 25 °C for 48 h are also shown. [Poly-**4b**] = 1.0 mM.

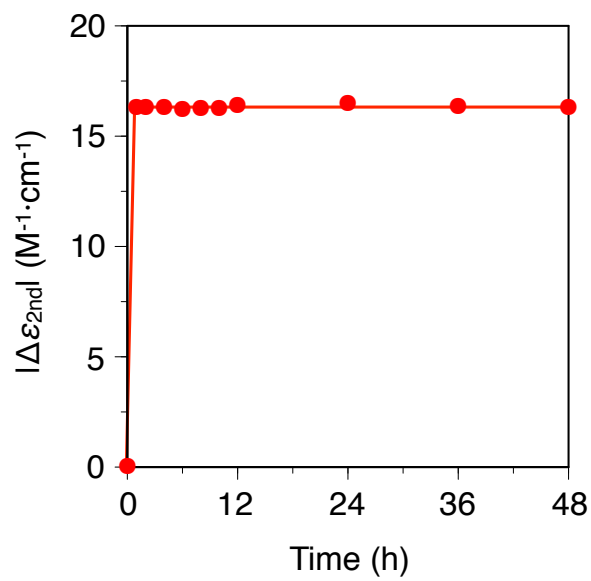

**Fig. S13.** Time-dependent CD intensity ( $|\Delta\epsilon_{2nd}|$ ) change of poly-**1b** in toluene/(*R*)-**A** (80/20, v/v) at 25 °C. [Poly-**1b**] = 1.0 mM.

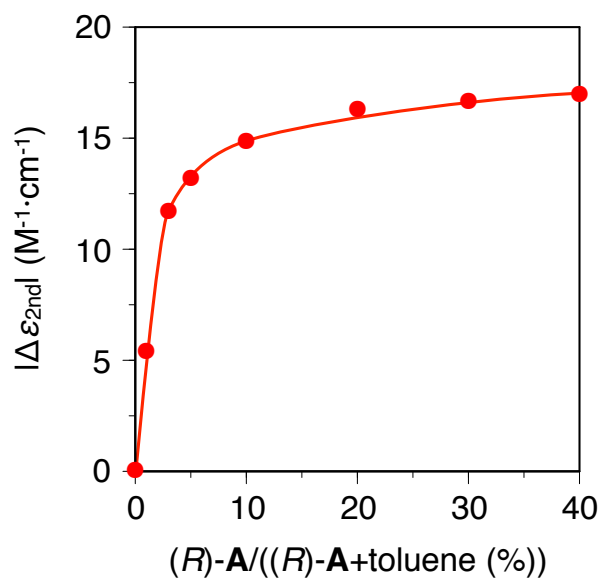

**Fig. S14.** CD titration curve ( $|\Delta\epsilon_{2nd}|$ ) of poly-**1b** with (*R*)-**A** in toluene at 25 °C after standing at 25 °C for 48 h. [Poly-**1b**] = 1.0 mM.

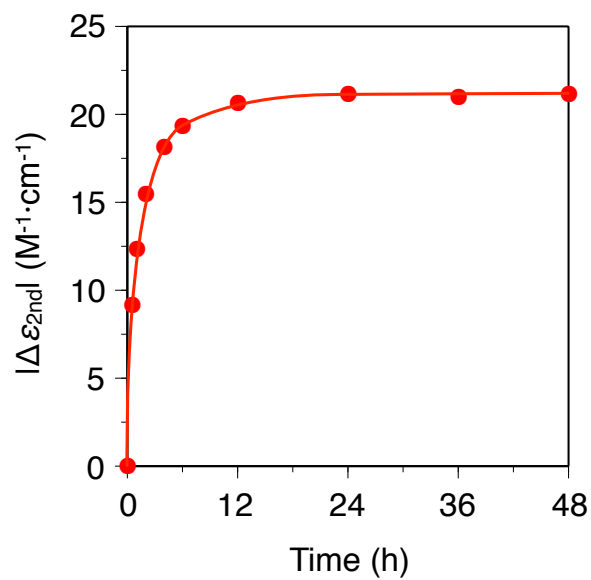

**Fig. S15.** Time-dependent CD intensity ( $|\Delta\epsilon_{2nd}|$ ) change of poly-**2b** in toluene/(*R*)-**A** (80/20, v/v) at 25 °C. [Poly-**2b**] = 1.0 mM.<sup>S3</sup>

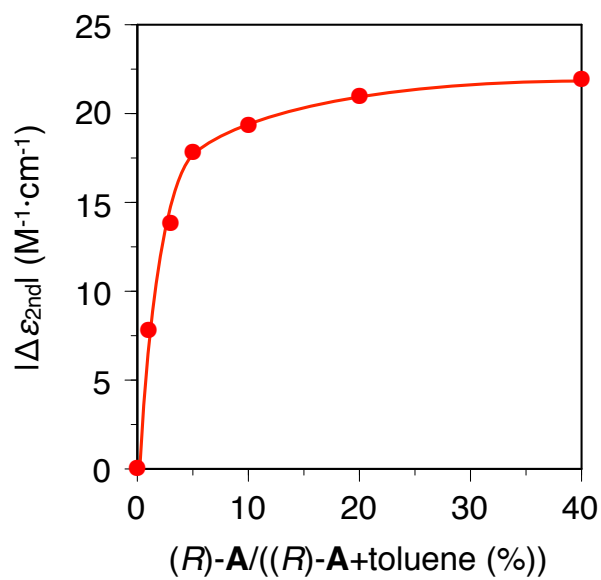

**Fig. S16.** CD titration curve ( $|\Delta\epsilon_{2nd}|$ ) of poly-**2b** with (*R*)-**A** in toluene at 25 °C after standing at 25 °C for 48 h. [Poly-**2b**] = 1.0 mM.<sup>S3</sup>

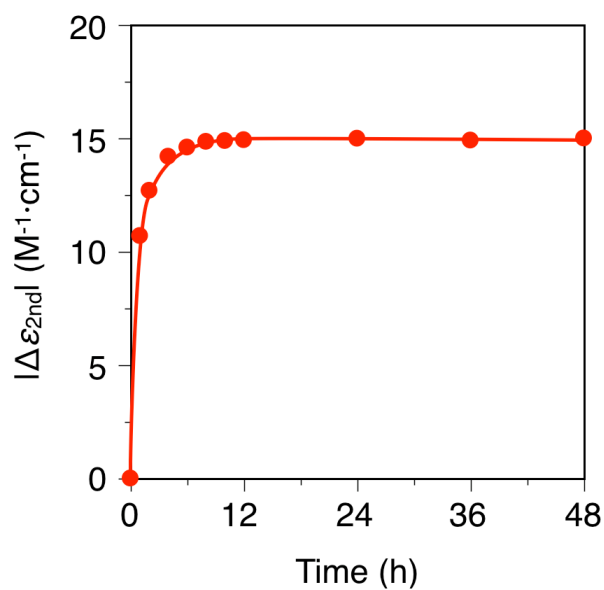

**Fig. S17.** Time-dependent CD intensity ( $|\Delta\epsilon_{2nd}|$ ) change of poly-**3b** in toluene/(*R*)-**A** (80/20, v/v) at 25 °C. [Poly-**3b**] = 1.0 mM.

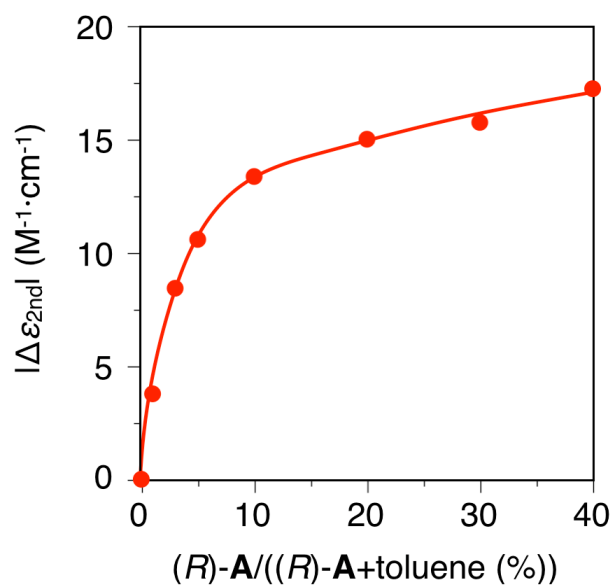

**Fig. S18.** CD titration curve ( $|\Delta\epsilon_{2nd}|$ ) of poly-**3b** with (*R*)-**A** in toluene at 25 °C after standing at 25 °C for 48 h. [Poly-**3b**] = 1.0 mM.

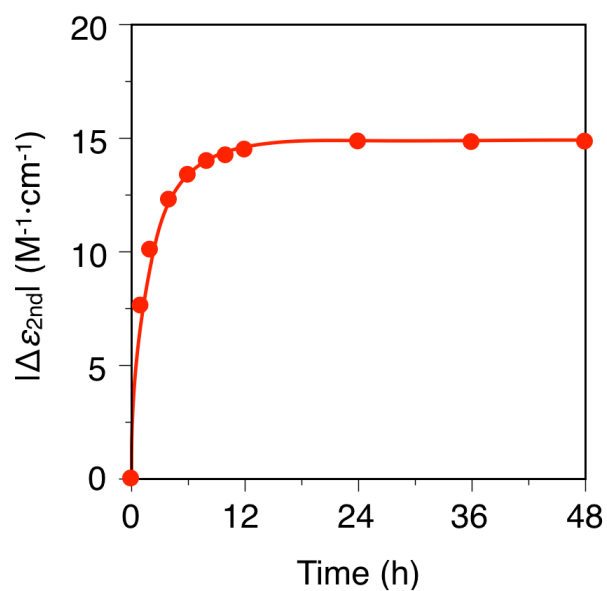

**Fig. S19.** Time-dependent CD intensity ( $|\Delta\epsilon_{2nd}|$ ) change of poly-4b in THF/(R)-A (60/40, v/v) at 25 °C. [Poly-4b] = 1.0 mM.

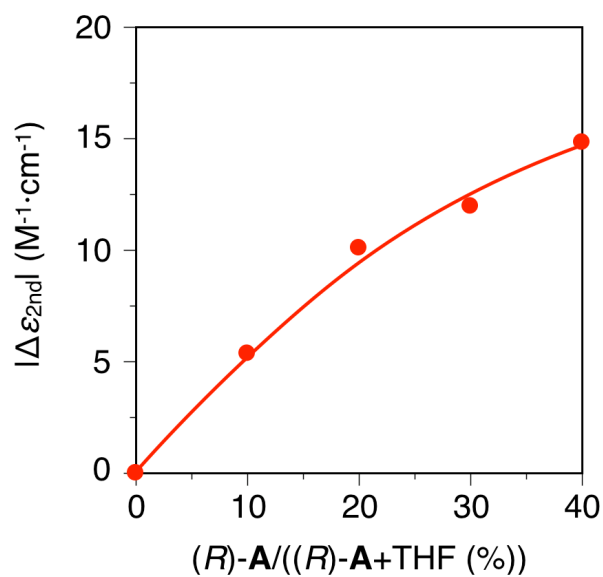

**Fig. S20.** CD titration curve ( $|\Delta\epsilon_{2nd}|$ ) of poly-4b with (R)-A in THF at 25 °C after standing at 25 °C for 48 h. [Poly-4b] = 1.0 mM.

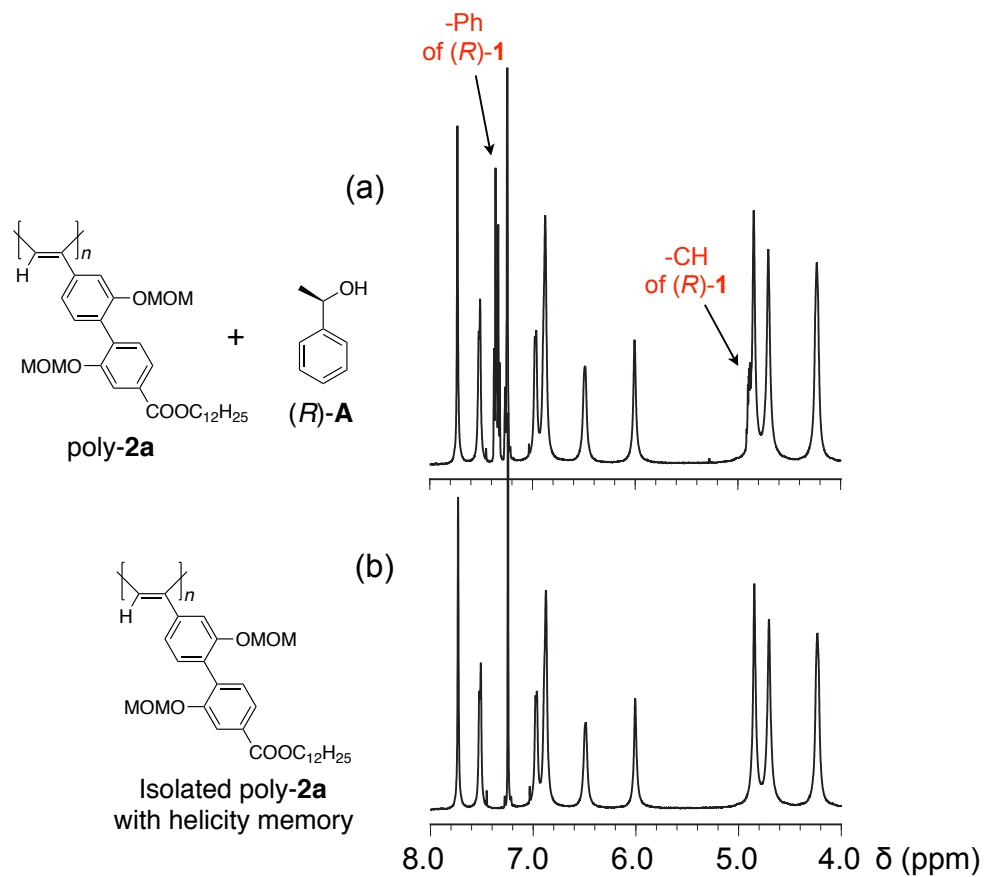

**Fig. S21.**  $^1\text{H}$  NMR spectra of poly-2a with (R)-A ( $[(R)\text{-A}]/[\text{poly-2a}] = 0.3$ ) (a) and the isolated poly-2a with helicity memory (b) in  $\text{CDCl}_3$  at  $55^\circ\text{C}$ .

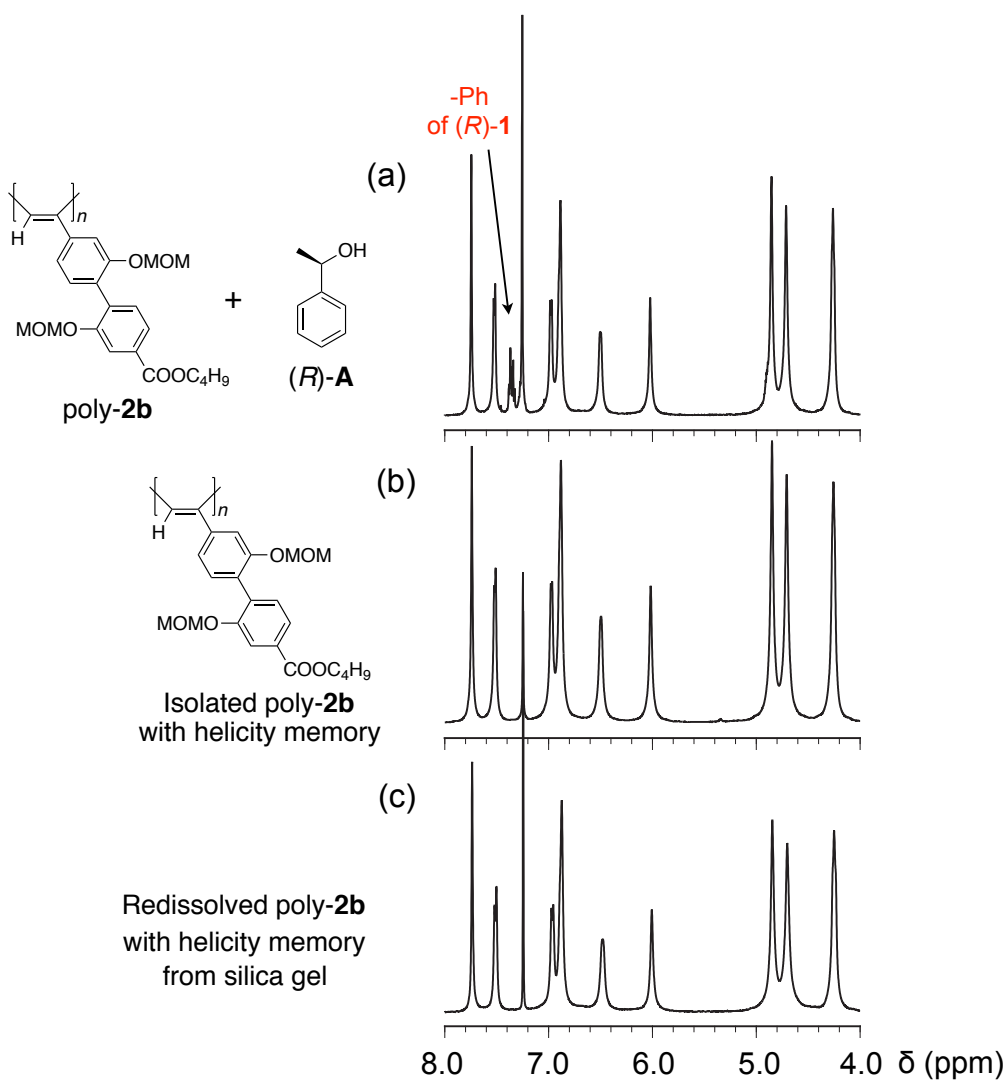

**Fig. S22.**  $^1\text{H}$  NMR spectra of poly-2b with (R)-A ( $[(R)\text{-A}]/[\text{poly-2a}] = 0.1$ ) (a), the isolated poly-2b with helicity memory (b) and the redissolved poly-2b with helicity memory from silica gel (c) in  $\text{CDCl}_3$  at  $55^\circ\text{C}$ .

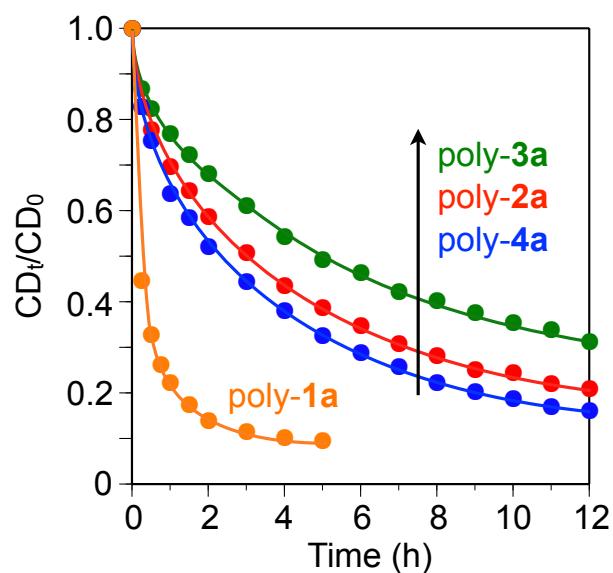

**Fig. S23.** Plots of the ICD intensity changes ( $CD_t/CD_0$ ) of the isolated poly-1a (orange line), poly-2a (red line), poly-3a (green line) and poly-4a (blue line) in toluene at 25 °C with time.  $CD_0$  represents the initial ICD intensity ( $\Delta\epsilon_{2nd}$ ) of the isolated polymers measured in toluene at –10 °C after helicity induction in toluene/(*R*)-A (80/20, v/v) at 25 °C for 48 h. [polymers] = 1.0 mM.

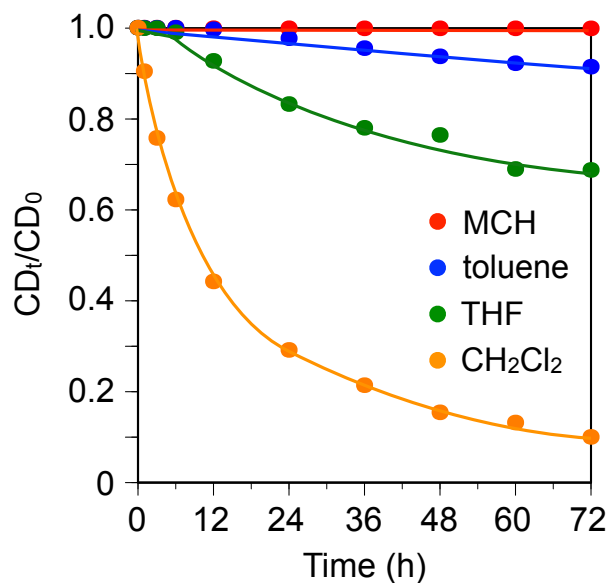

**Fig. S24.** Plots of the ICD intensity changes ( $CD_t/CD_0$ ) of the isolated poly-2a at –10 °C in various solvents with time. The ICD intensity changes were estimated based on the ICD values of  $\Delta\epsilon_{2nd}$  and the  $CD_0$  represents the initial ICD intensity of the isolated poly-2a in each solvent at –10 °C. [poly-2a] = 1.0 mM.



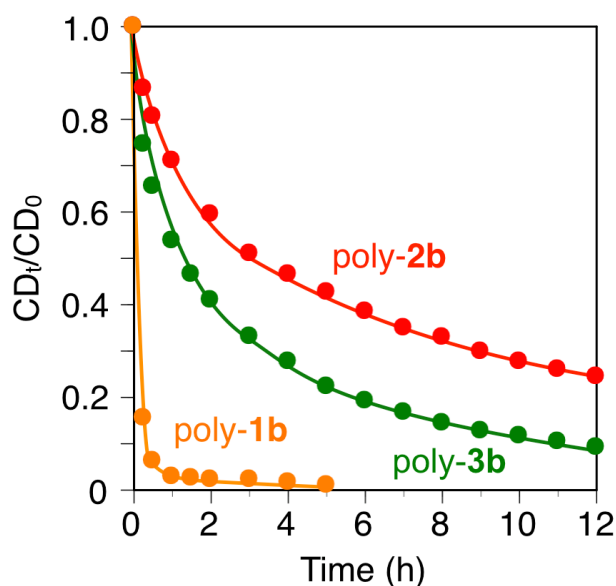

**Fig. S25.** Plots of the ICD intensity changes ( $CD_t/CD_0$ ) of isolated poly-1b (orange line), poly-2b (red line) and poly-3b (green line) in toluene at 25 °C with time.  $CD_0$  represents the initial ICD intensity of the isolated polymers in toluene at –10 °C after helicity induction in toluene/(*R*)-A (80/20, v/v) at 25 °C for 48 h. [Polymers] = 1.0 mM.

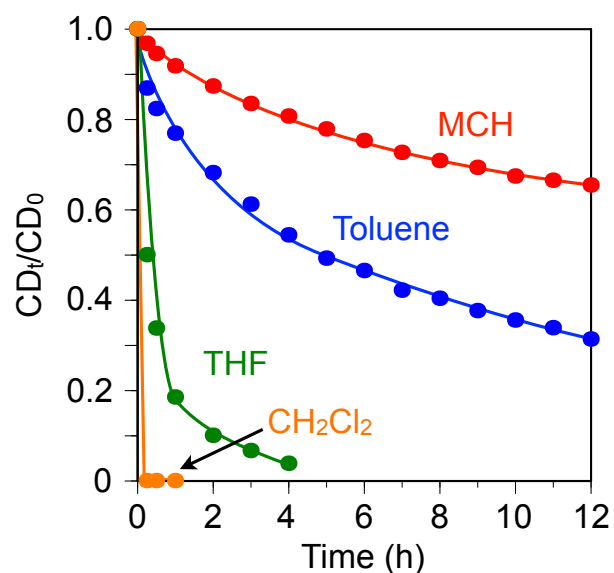

**Fig. S26.** Plots of the ICD intensity changes ( $CD_t/CD_0$ ) of the isolated poly-2a at 25 °C in various solvents with time. The ICD intensity changes were estimated based on the ICD values of  $\Delta\epsilon_{2nd}$  and the  $CD_0$  represents the initial ICD intensity of the isolated poly-2a in each solvent at –10 °C. [poly-2a] = 1.0 mM.

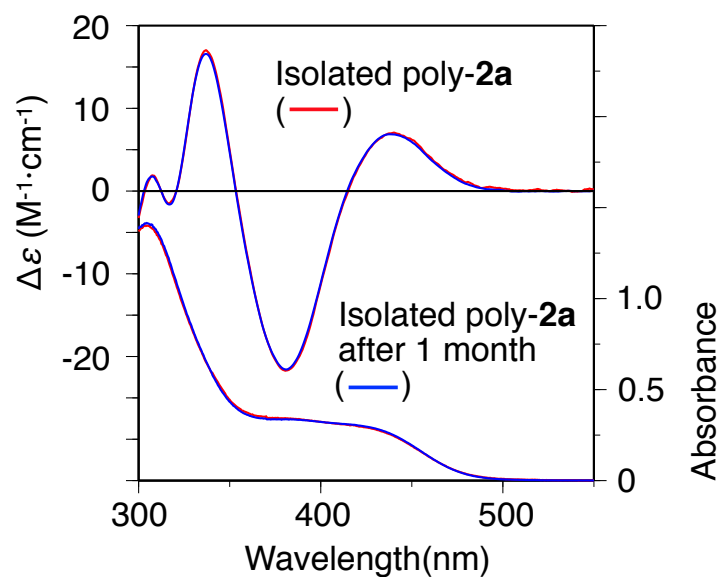

**Fig. S27.** CD and absorption spectra of poly-**2a** measured in toluene at  $-10\text{ }^{\circ}\text{C}$  just after isolation (red lines) and those after standing at  $25\text{ }^{\circ}\text{C}$  for 1 month in the solid state (blue lines).

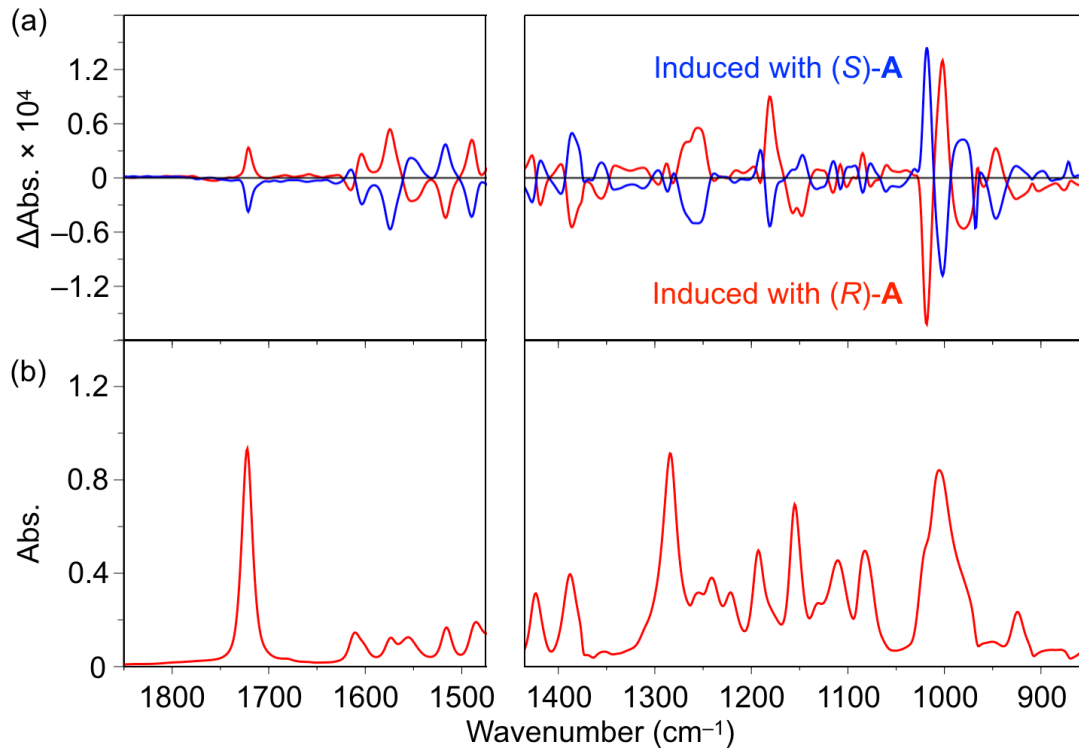

**Fig. S28.** (a) VCD spectra of the isolated poly-**2a** in MCH at  $-10\text{ }^{\circ}\text{C}$  after helicity induction with (*R*)-**A** (red line) and (*S*)-**A** (blue line). (b) IR spectrum of the isolated poly-**2a** in MCH at  $-10\text{ }^{\circ}\text{C}$  after helicity induction with (*R*)-**A** is also shown.

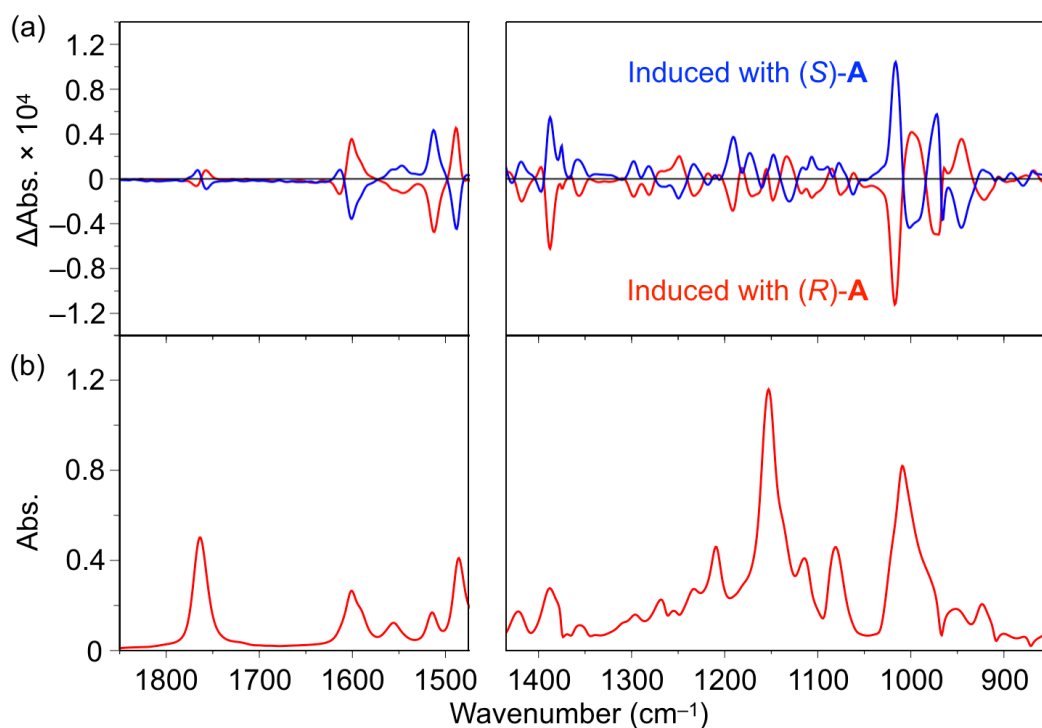

**Fig. S29.** (a) VCD spectra of the isolated poly-**3a** in MCH at  $-10\text{ }^{\circ}\text{C}$  after helicity induction with (*R*)-**A** (red line) and (*S*)-**A** (blue line). (b) IR spectrum of the isolated poly-**3a** in MCH at  $-10\text{ }^{\circ}\text{C}$  after helicity induction with (*R*)-**A** is also shown.

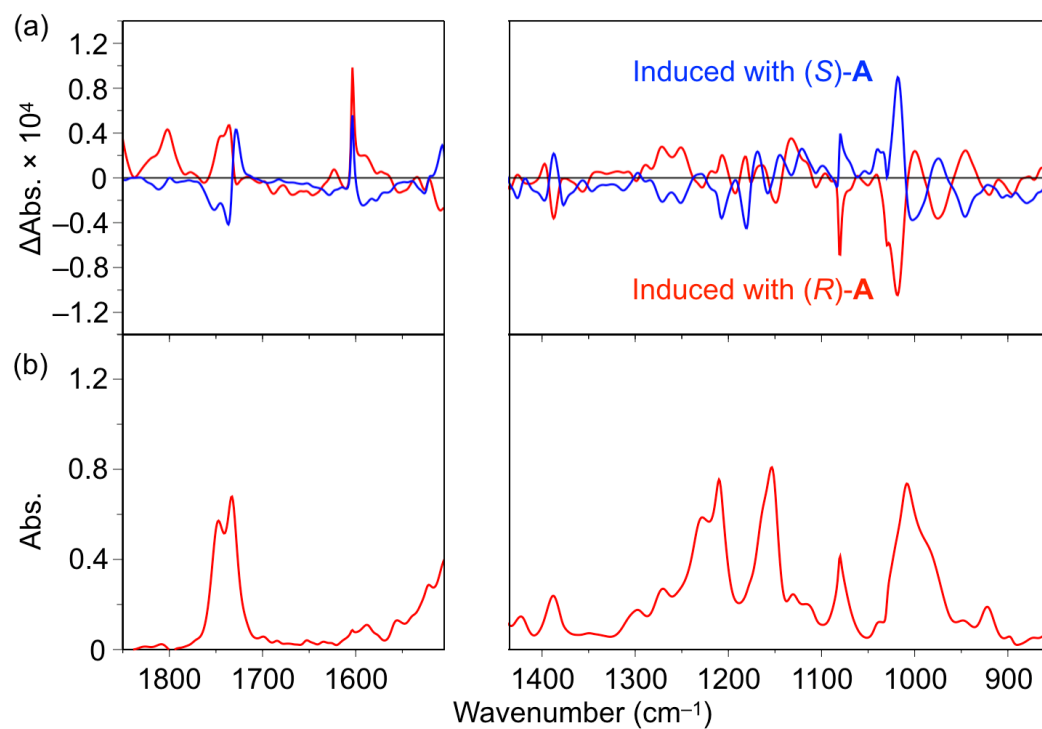

**Fig. S30.** (a) VCD spectra of the isolated poly-**4a** in toluene at  $-10\text{ }^{\circ}\text{C}$  after helicity induction with (*R*)-**A** (red line) and (*S*)-**A** (blue line). (b) IR spectrum of the isolated poly-**4a** in toluene at  $-10\text{ }^{\circ}\text{C}$  after helicity induction with (*R*)-**A** is also shown.

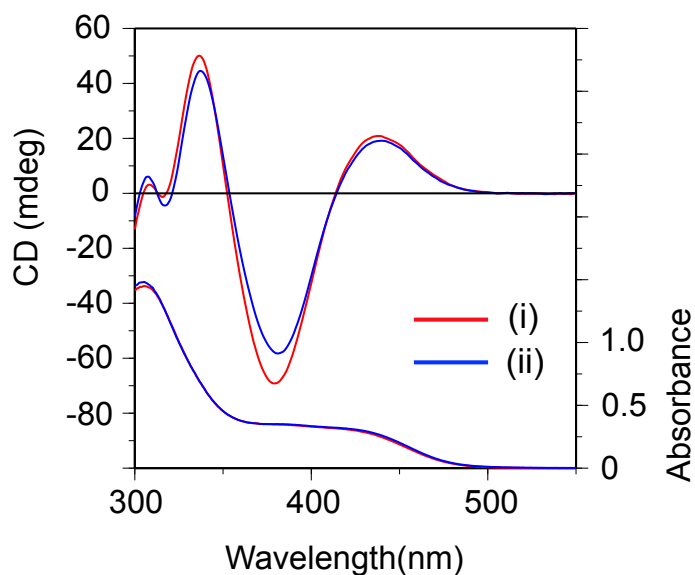

**Fig. S31.** CD and absorption spectra of poly-**2b** measured in toluene/(*R*)-**A** (80/20, v/v) at 25 °C after standing at 25 °C for 48 h (i) and the recovered poly-**2b** from silica surface in toluene at –10 °C (ii).

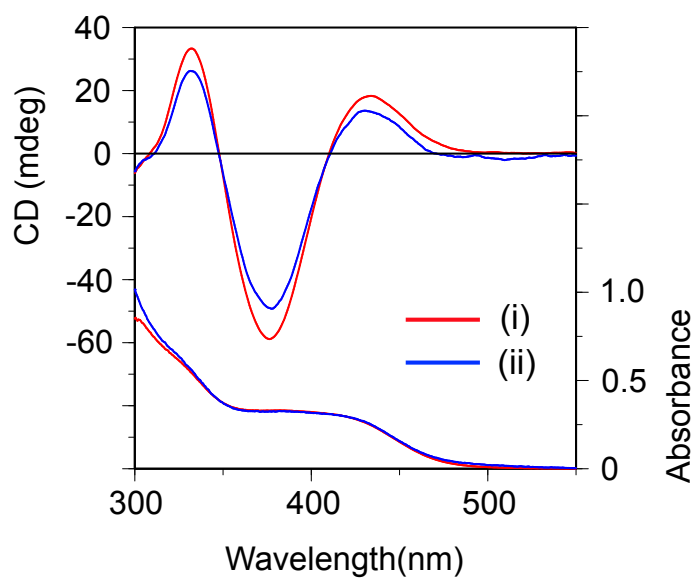

**Fig. S32.** CD and absorption spectra of poly-**3b** measured in toluene/(*R*)-**A** (80/20, v/v) at 25 °C after standing at 25 °C for 48 h (i) and the recovered poly-**3b** from silica surface in toluene at –10 °C (ii).

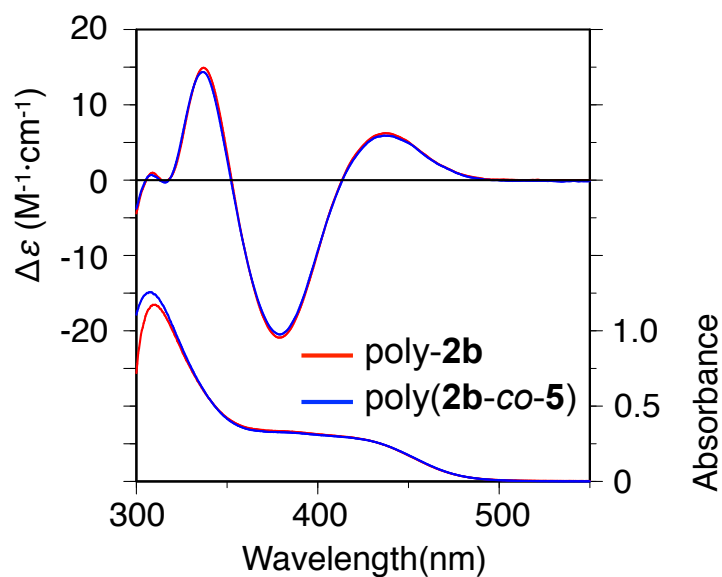

**Fig. S33.** CD and absorption spectra of poly-**2b** (red lines) and poly(**2b-co-5**) (blue lines) measured in toluene/(*R*)-**A** (50/50, v/v) at 25 °C after standing at 25 °C for 48 h. [Polymer] = 1.0 mM.

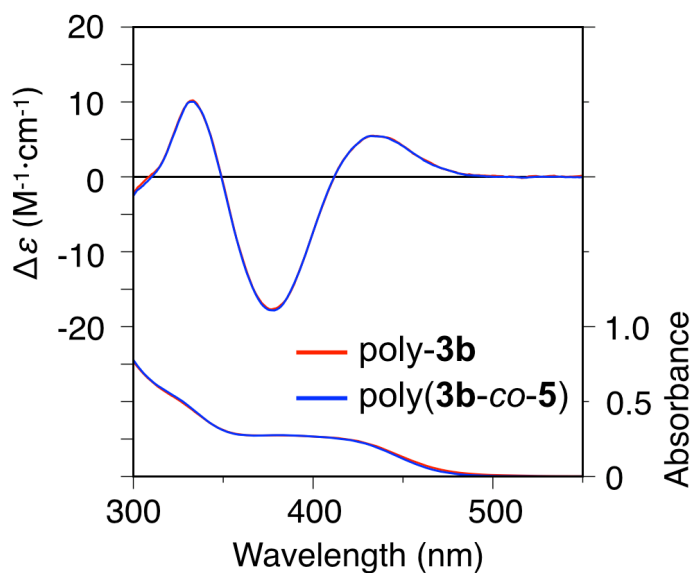

**Fig. S34.** CD and absorption spectra of poly-**3b** (red lines) and poly(**3b-co-5**) (blue lines) measured in toluene/(*R*)-**A** (50/50, v/v) at 25 °C after standing at 25 °C for 48 h. [Polymer] = 1.0 mM.

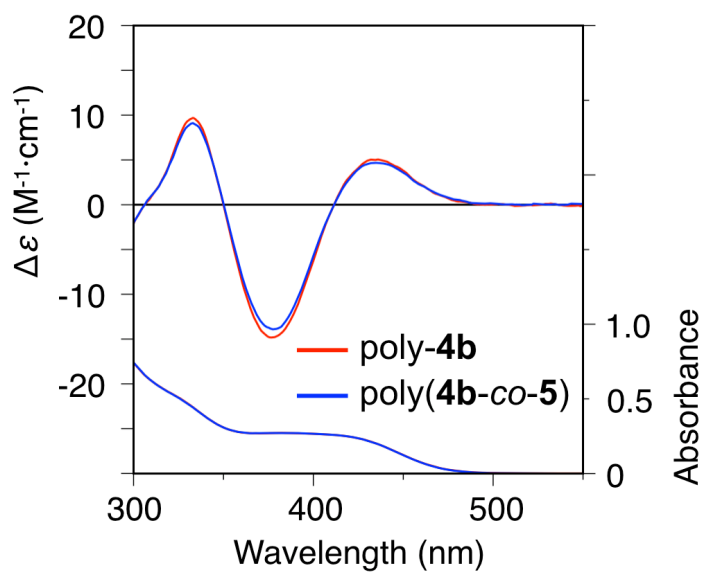

**Fig. S35.** CD and absorption spectra of poly-**4b** (red lines) and poly(**4b-co-5**) (blue lines) measured in THF/(*R*)-**A** (60/40, v/v) at 25 °C after standing at 25 °C for 48 h. [Polymer] = 1.0 mM.

**Table S2.** Resolution results of racemates **E**, **I** and **J** on Si-poly(**2b-co-5**)-based CSP

| racemates | <i>P</i> -Si-poly( <b>2b-co-5</b> )  |          | <i>M</i> -Si-poly( <b>2b-co-5</b> )  |          | <i>P'</i> -Si-poly( <b>2b-co-5</b> ) |          |
|-----------|--------------------------------------|----------|--------------------------------------|----------|--------------------------------------|----------|
|           | (induced by ( <i>R</i> )- <b>A</b> ) |          | (induced by ( <i>S</i> )- <b>A</b> ) |          | (induced by ( <i>R</i> )- <b>A</b> ) |          |
|           | <i>k</i> <sub>1</sub>                | $\alpha$ | <i>k</i> <sub>1</sub>                | $\alpha$ | <i>k</i> <sub>1</sub>                | $\alpha$ |
| <b>E</b>  | 2.67                                 | 1.06 (+) | 2.61                                 | 1.05 (–) | 2.46                                 | 1.06 (+) |
| <b>I</b>  | 0.57                                 | 1.11 (–) | 0.57                                 | 1.11 (+) | 0.57                                 | 1.10 (–) |
| <b>J</b>  | 0.81                                 | 1.14 (–) | 0.80                                 | 1.14 (+) | 0.80                                 | 1.14 (–) |

Column: 25 x 0.20 (i.d.) cm; eluent: *n*-hexane–2-propanol (97/3, v/v); flow rate: 0.2 mL/min. The signs in parentheses represent the Cotton effect signs at 254 nm of the first-eluted enantiomers.

**Table S3.** Resolution results of racemates **C** and **D** on Si-poly(**3b-co-5**)-based CSP

| racemates | <i>P</i> -Si-poly( <b>3b-co-5</b> )  |          | <i>M</i> -Si-poly( <b>3b-co-5</b> )  |          | <i>P'</i> -Si-poly( <b>3b-co-5</b> ) |          |
|-----------|--------------------------------------|----------|--------------------------------------|----------|--------------------------------------|----------|
|           | (induced by ( <i>R</i> )- <b>A</b> ) |          | (induced by ( <i>S</i> )- <b>A</b> ) |          | (induced by ( <i>R</i> )- <b>A</b> ) |          |
|           | <i>k</i> <sub>1</sub>                | $\alpha$ | <i>k</i> <sub>1</sub>                | $\alpha$ | <i>k</i> <sub>1</sub>                | $\alpha$ |
| <b>C</b>  | 6.00                                 | 1.07 (–) | 6.08                                 | 1.07 (+) | 6.16                                 | 1.07 (–) |
| <b>D</b>  | 3.34                                 | 1.12 (–) | 3.31                                 | 1.13 (+) | 3.29                                 | 1.13 (–) |

Column: 25 x 0.20 (i.d.) cm; eluent: *n*-hexane–2-propanol (97/3, v/v); flow rate: 0.2 mL/min. The signs in parentheses represent the Cotton effect signs at 254 nm of the first-eluted enantiomers.

**Table S4.** Resolution results of racemates **D**, **E** and **H** on Si-poly(**4b-co-5**)-based CSP

| racemates | <i>P</i> -Si-poly( <b>4b-co-5</b> )  |          | <i>M</i> -Si-poly( <b>4b-co-5</b> )  |          | <i>P'</i> -Si-poly( <b>4b-co-5</b> ) |          |
|-----------|--------------------------------------|----------|--------------------------------------|----------|--------------------------------------|----------|
|           | (induced by ( <i>R</i> )- <b>A</b> ) |          | (induced by ( <i>S</i> )- <b>A</b> ) |          | (induced by ( <i>R</i> )- <b>A</b> ) |          |
|           | <i>k</i> <sub>1</sub>                | $\alpha$ | <i>k</i> <sub>1</sub>                | $\alpha$ | <i>k</i> <sub>1</sub>                | $\alpha$ |
| <b>D</b>  | 2.08                                 | 1.35 (–) | 2.06                                 | 1.34 (+) | 2.13                                 | 1.34 (–) |
| <b>E</b>  | 5.30                                 | 1.08 (+) | 4.92                                 | 1.07 (–) | 5.06                                 | 1.07 (+) |
| <b>H</b>  | 3.21                                 | 1.08 (–) | 3.22                                 | 1.06 (+) | 3.35                                 | 1.06 (–) |

Column: 25 x 0.20 (i.d.) cm; eluent: *n*-hexane–2-propanol (97/3, v/v); flow rate: 0.2 mL/min. The signs in parentheses represent the Cotton effect signs at 254 nm of the first-eluted enantiomers.

## 10. $^1\text{H}$ and $^{13}\text{C}$ NMR spectra of monomers and polymers

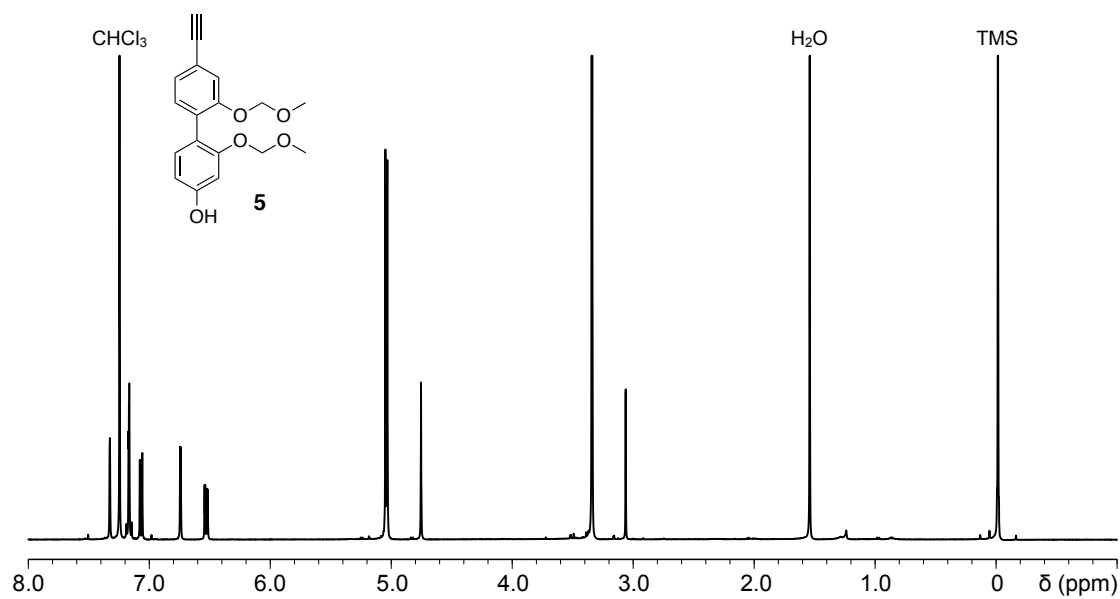

**Fig. S36.**  $^1\text{H}$  NMR spectrum of **5** in  $\text{CDCl}_3$  at 25 °C.

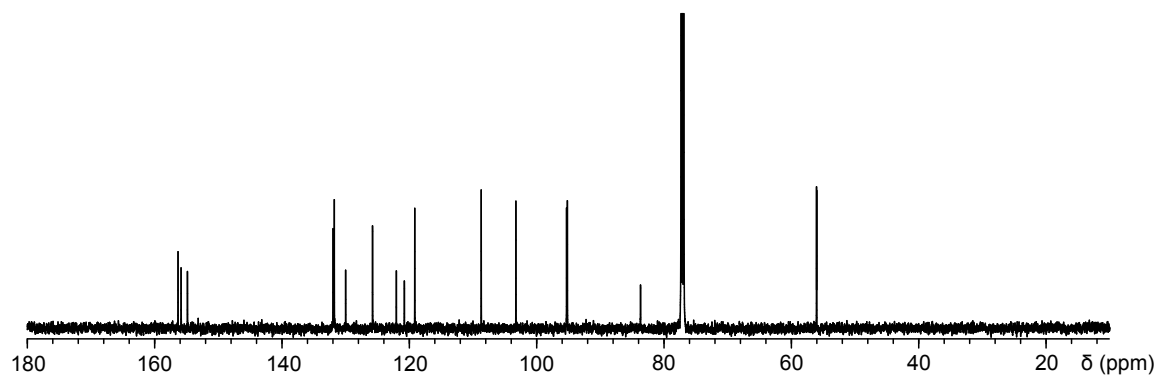

**Fig. S37.**  $^{13}\text{C}$  NMR spectrum of **5** in  $\text{CDCl}_3$  at 25 °C.



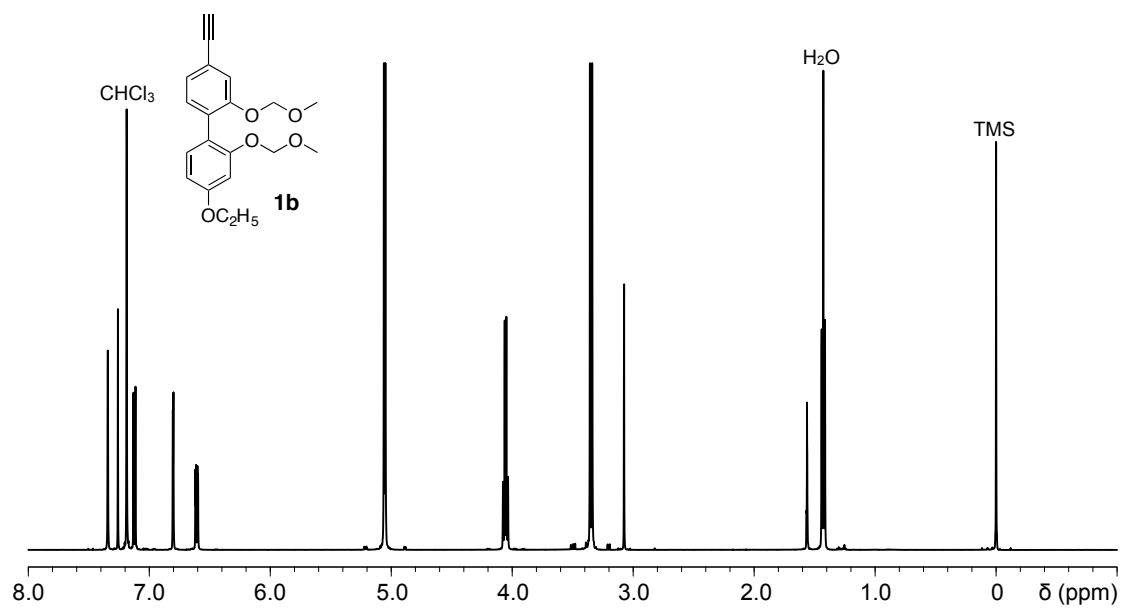

**Fig. S38.** <sup>1</sup>H NMR spectrum of **1b** in CDCl<sub>3</sub> at 25 °C.

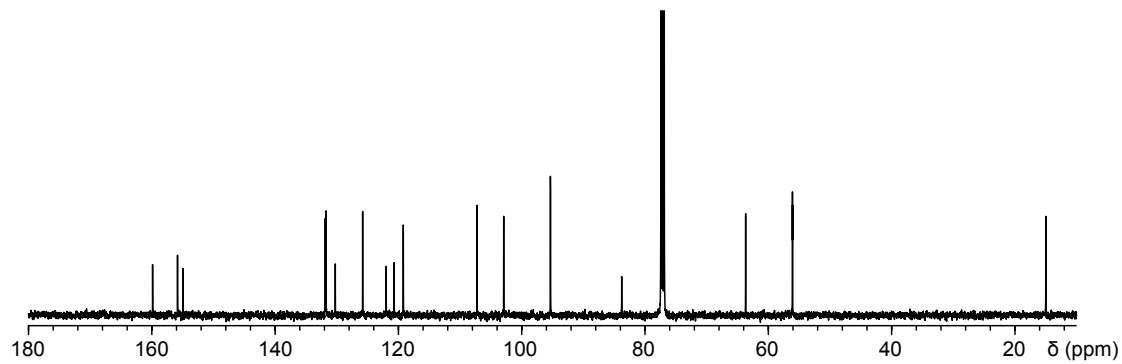

**Fig. S39.** <sup>13</sup>C NMR spectrum of **1b** in CDCl<sub>3</sub> at 25 °C.

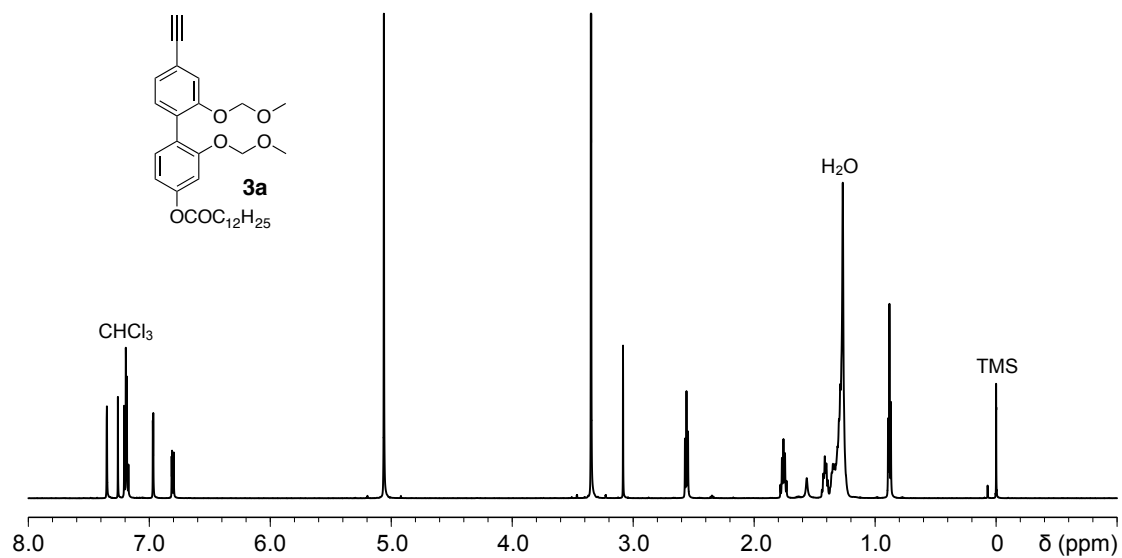

**Fig. S40.** <sup>1</sup>H NMR spectrum of **3a** in CDCl<sub>3</sub> at 25 °C.

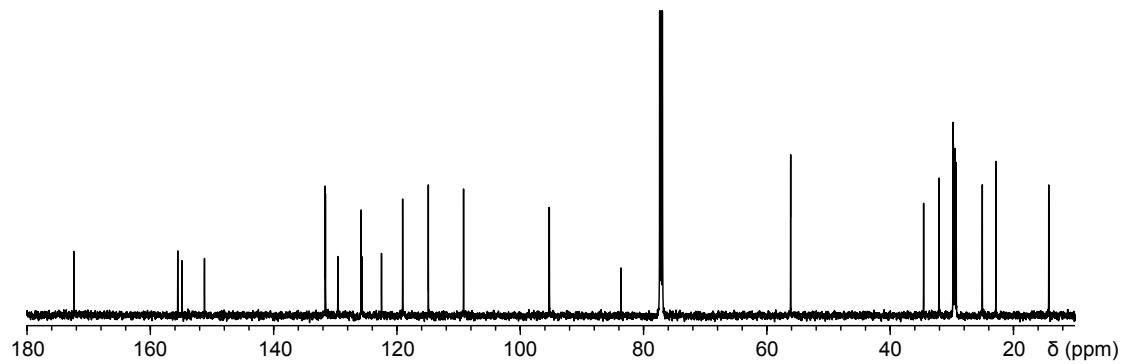

**Fig. S41.** <sup>13</sup>C NMR spectrum of **3a** in CDCl<sub>3</sub> at 25 °C.

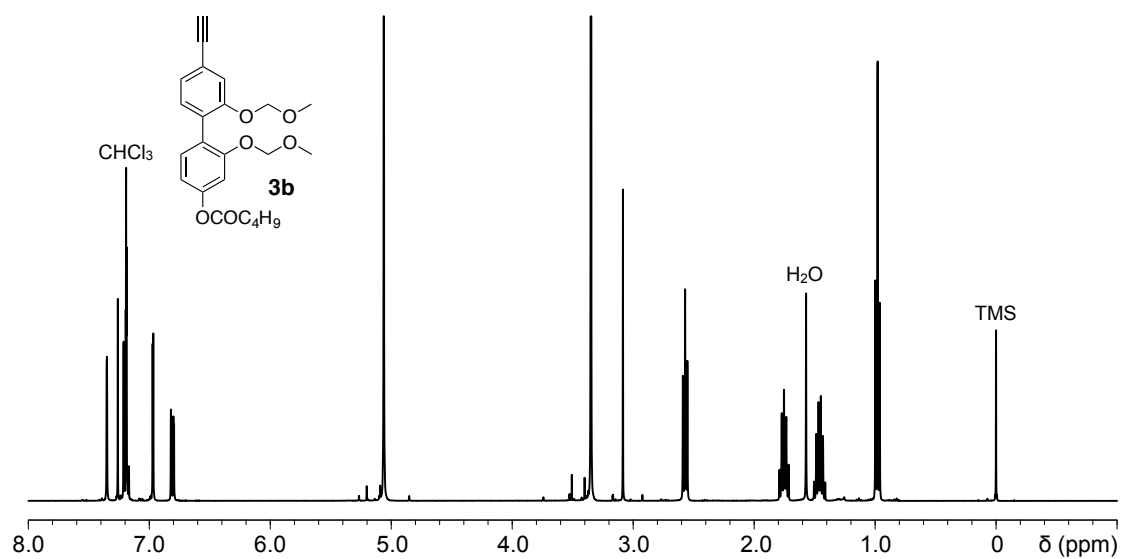

**Fig. S42.**  $^1\text{H}$  NMR spectrum of **3b** in  $\text{CDCl}_3$  at 25 °C.

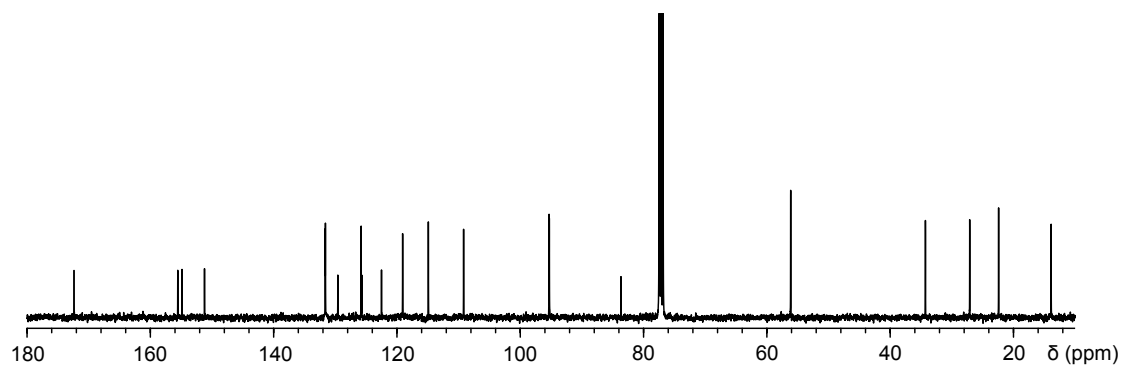

**Fig. S43.**  $^{13}\text{C}$  NMR spectrum of **3b** in  $\text{CDCl}_3$  at 25 °C.

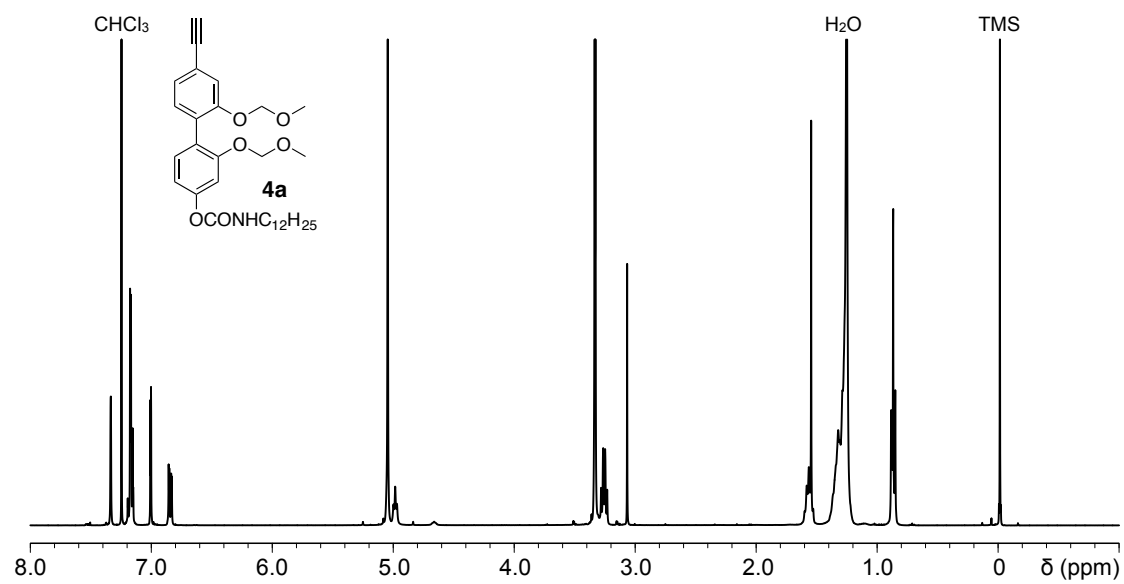

**Fig. S44.** <sup>1</sup>H NMR spectrum of **4a** in CDCl<sub>3</sub> at 25 °C.

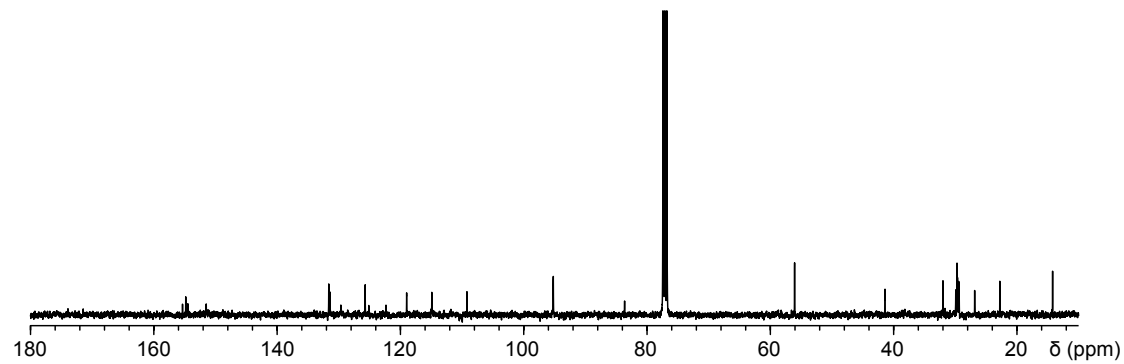

**Fig. S45.** <sup>13</sup>C NMR spectrum of **4a** in CDCl<sub>3</sub> at 25 °C.

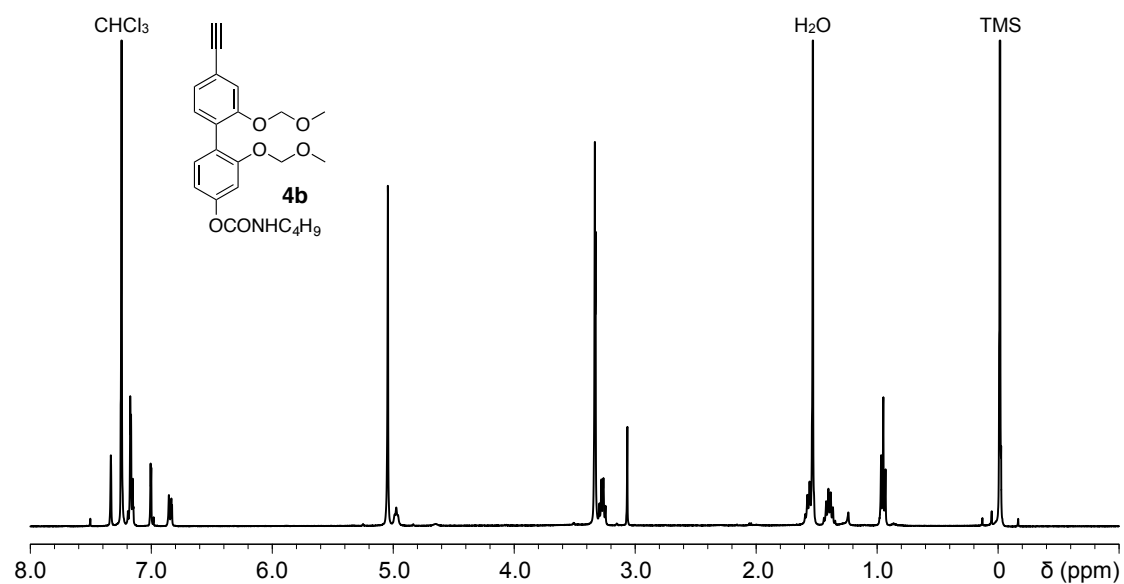

**Fig. S46.** <sup>1</sup>H NMR spectrum of **4b** in CDCl<sub>3</sub> at 25 °C.

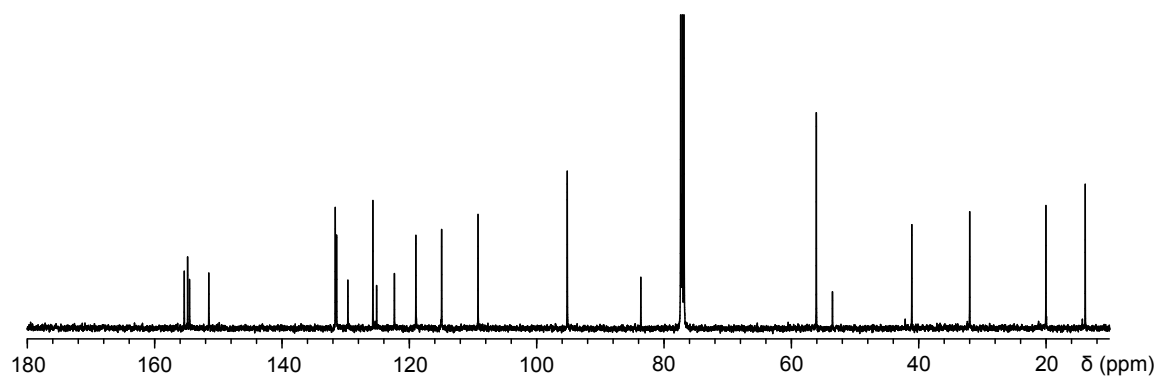

**Fig. S47.** <sup>13</sup>C NMR spectrum of **4b** in CDCl<sub>3</sub> at 25 °C.

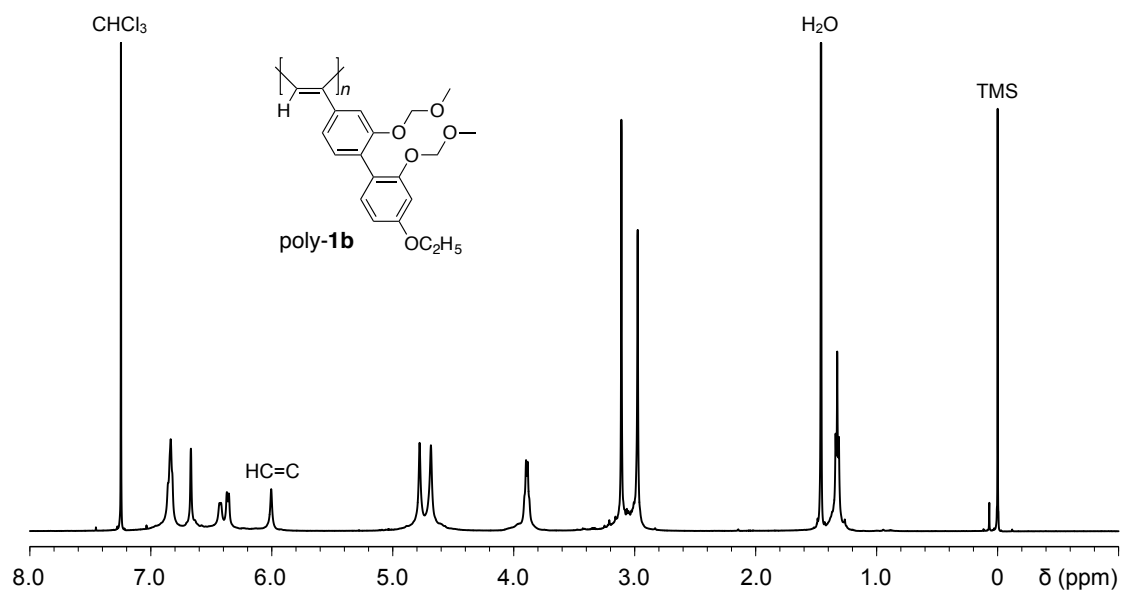

**Fig. S48.** <sup>1</sup>H NMR spectrum of poly-1b in CDCl<sub>3</sub> at 55 °C.

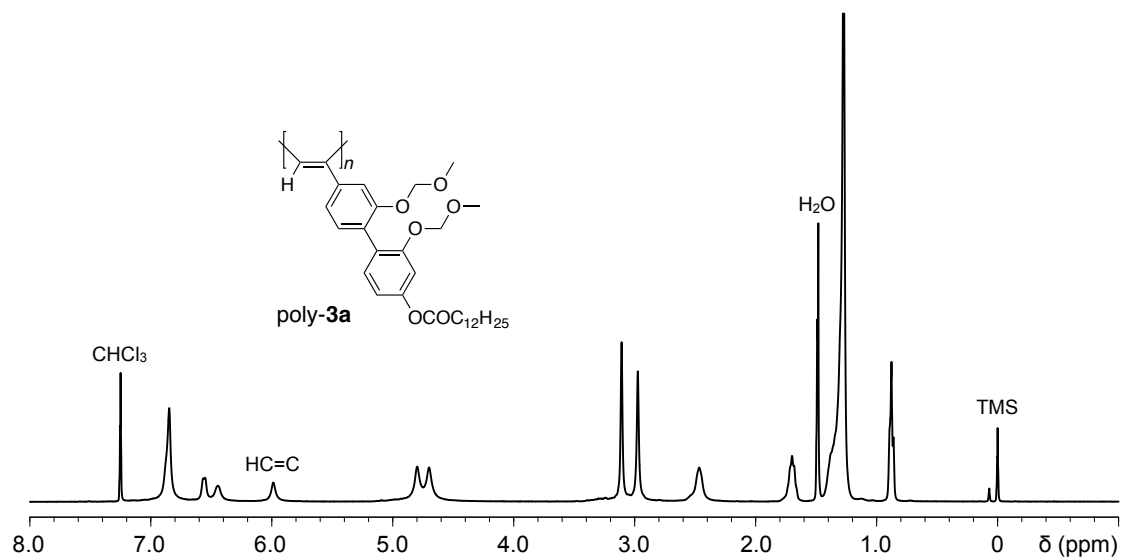

**Fig. S49.** <sup>1</sup>H NMR spectrum of poly-3a in CDCl<sub>3</sub> at 55 °C.

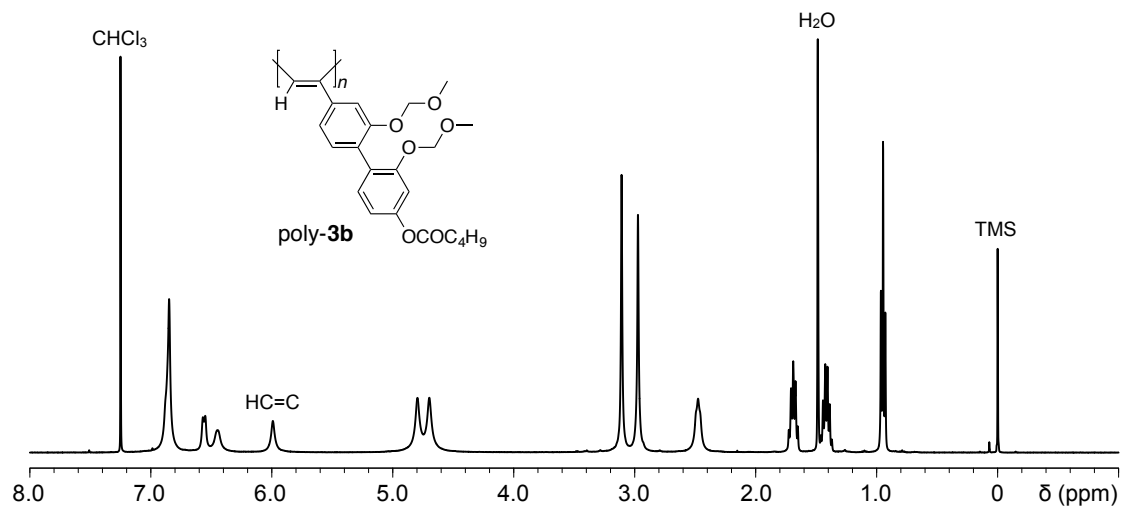

**Fig. S50.** <sup>1</sup>H NMR spectrum of poly-3b in CDCl<sub>3</sub> at 55 °C.

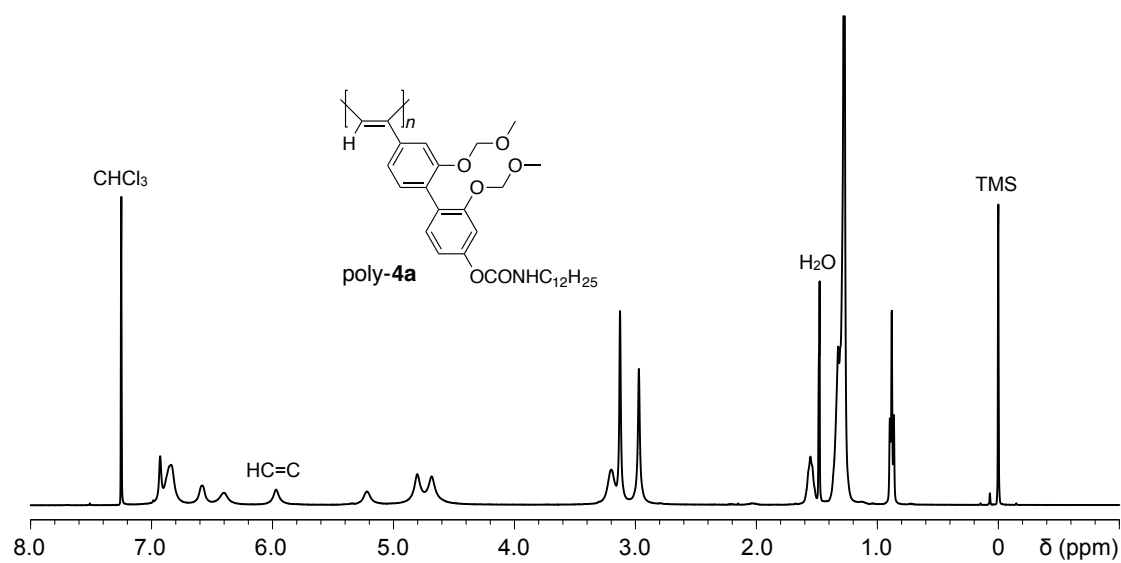

**Fig. S51.** <sup>1</sup>H NMR spectrum of poly-4a in CDCl<sub>3</sub> at 55 °C.

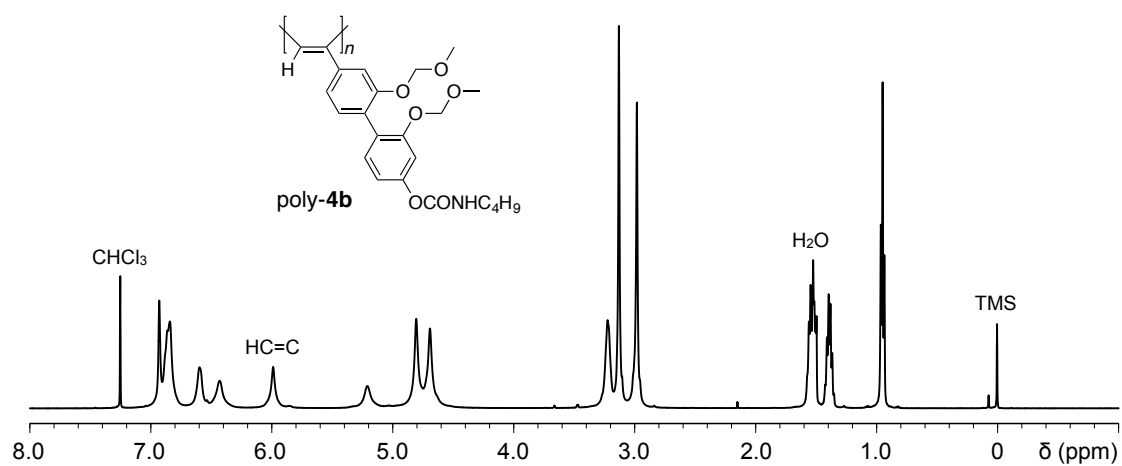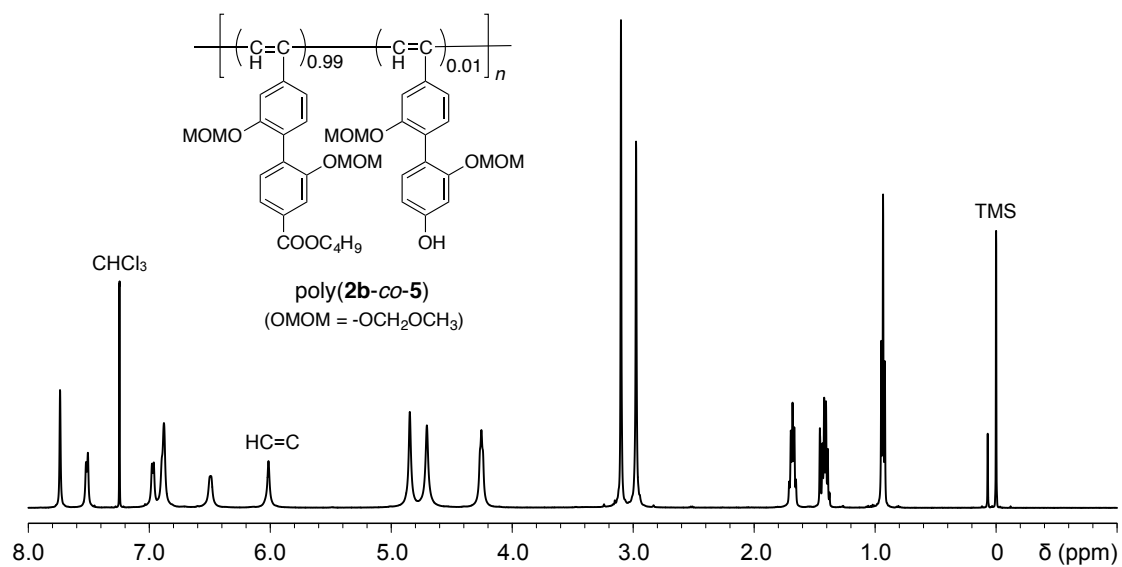



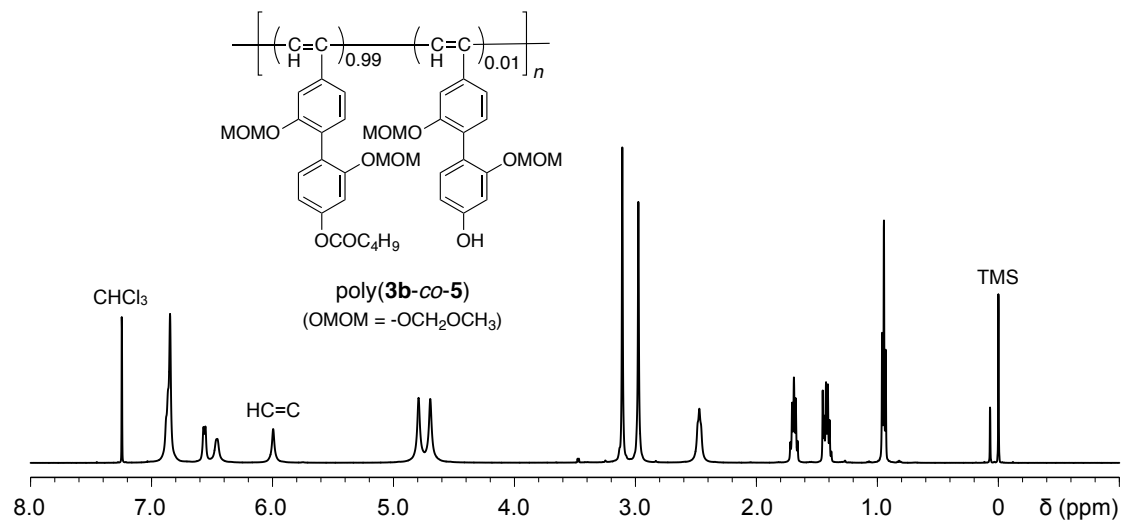

**Fig. S54.** <sup>1</sup>H NMR spectrum of poly(**3b-co-5**) in CDCl<sub>3</sub> at 55 °C.

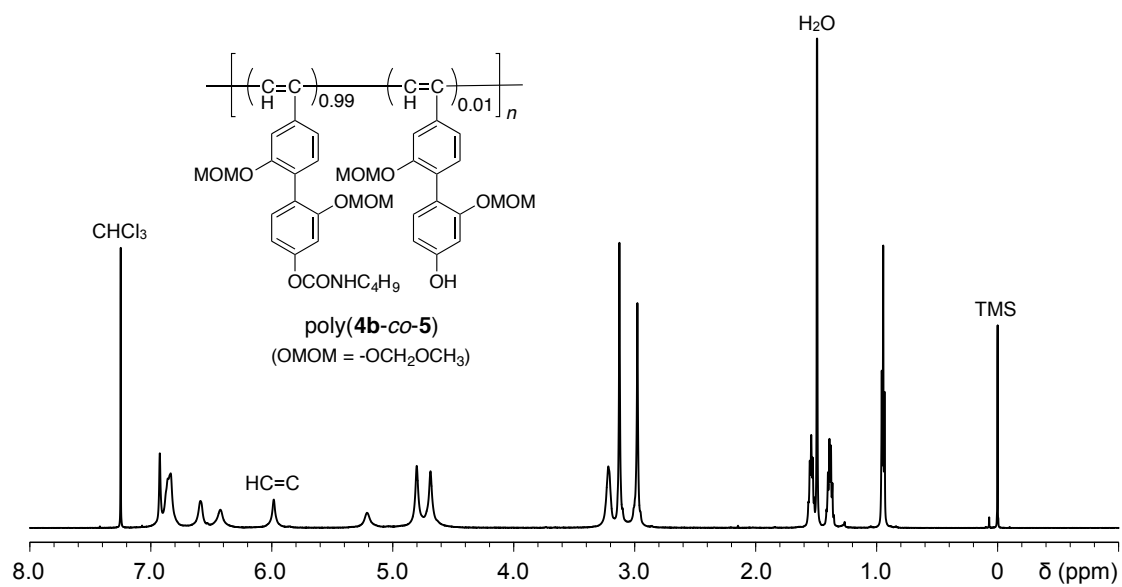

**Fig. S55.** <sup>1</sup>H NMR spectrum of poly(**4b-co-5**) in CDCl<sub>3</sub> at 55 °C.

## 11. Supporting references

- S1. K. Maeda, D. Hirose, N. Okoshi, K. Shimomura, Y. Wada, T. Ikai, S. Kanoh and E. Yashima, *J. Am. Chem. Soc.*, 2018, **140**, 3270-3276.
- S2. R. Ishidate, T. Ikai, S. Kanoh, E. Yashima and K. Maeda, *Chirality*, 2017, **29**, 120-129.
- S3. R. Ishidate, K. Shimomura, T. Ikai, S. Kanoh and K. Maeda, *Chem. Lett.*, 2015, **44**, 946-948.
- S4. K. Shimomura, T. Ikai, S. Kanoh, E. Yashima and K. Maeda, *Nat. Chem.*, 2014, **6**, 429-434.
- S5. Y. Okamoto, R. Aburatani and K. Hatada, *J. Chromatogr.*, 1987, **389**, 95-102.
- S6. Y. Okamoto, M. Kawashima and K. Hatada, *J. Chromatogr.*, 1986, **363**, 173-186.
- S7. H. Koller, K.-H. Rimböck and A. Mannschreck, *J. Chromatogr. A*, 1983, **282**, 89-94.
